# Supplementary material for: Obtaining sub-daily new snow density from automated measurements in high mountain regions
Source: Copernicus journal article supplement (doi:10.5194/hess-22-2655-2018), 2018-05-04
Supplement: Supplementary file 2 [file hess-22-2655-2018-supplement.zip]

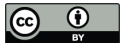

## *Supplement of*

# **Obtaining sub-daily new snow density from automated measurements in high mountain regions**

**Kay Helfricht et al.**

*Correspondence to:* Kay Helfricht ([kay.helfricht@oeaw.ac.at](mailto:kay.helfricht@oeaw.ac.at))

- [hess-22-2655-2018-supplement-title-page.pdf](#)
- Supplement
  - S01.pdf
  - S02.pdf
  - S03.pdf
  - S04.pdf
  - S05.pdf
  - S06.pdf
  - S07.pdf
  - S08.pdf
  - S09.pdf
  - S10.pdf
  - S11.pdf
  - S12.pdf
  - S13.pdf
  - S14.pdf
  - S15.pdf
  - S16.pdf
  - S17.pdf
  - Supplement.docx
  - kuehrint\_20111001\_20150520.txt
  - kuehtai\_19870227\_20150520.txt
  - revised supplement.pdf
  - wattener\_lizum\_20101001\_20150520.txt
  - weissfluhjoch\_20131001\_20150520.txt

The copyright of individual parts of the supplement might differ from the CC BY 4.0 License.
