# Supplementary material for: Obtaining sub-daily new snow density from automated measurements in high mountain regions
Source: Copernicus journal article supplement (doi:10.5194/hess-22-2655-2018), 2018-05-04
Supplement: Supplementary file 4 [file hess-22-2655-2018-supplement.zip]

Archive with 25 entries (24 files):
- Supplement/
- Supplement/kuehroint_20111001_20150520.txt
- Supplement/S10.pdf
- Supplement/S09.pdf
- Supplement/S13.pdf
- Supplement/kuehtai_19870227_20150520.txt
- Supplement/S16.pdf
- Supplement/S12.pdf
- Supplement/S01.pdf
- Supplement/S03.pdf
- Supplement/revised supplement.pdf
- Supplement/S15.pdf
- Supplement/S02.pdf
- Supplement/S08.pdf
- Supplement/S04.pdf
- Supplement/S17.pdf
- Supplement/wattener_lizum 20101001_20150520.txt
- Supplement/S05.pdf
- Supplement/weissfluhjoch_20131001_20150520.txt
- Supplement/S07.pdf
- Supplement/S11.pdf
- Supplement/S14.pdf
- Supplement/S06.pdf
- Supplement/Supplement.docx
- hess-22-2655-2018-supplement-title-page.pdf
