# Supplementary material for: Obtaining sub-daily new snow density from automated measurements in high mountain regions
Source: Copernicus journal article supplement (doi:10.5194/hess-22-2655-2018), 2018-05-04
Supplement: Supplementary file 4 [file hess-22-2655-2018-supplement.zip › Supplement/kuehroint_20111001_20150520.txt]

date[yyyymmddHHMM]	HS[cm]	HN[cm]	HN_corr[cm]	SWE[mm]	HNW[mm]	density[kgm-3]	density_corr[kgm-3]
201110080900	6.1	5.1	5.1	15.0	4.4	86.2	85.3
201110081900	11.5	2.4	2.5	19.0	1.7	70.8	68.0
201110090200	21.1	4.7	5.6	26.3	3.6	76.6	64.4
201110090300	23.3	2.2	3.4	29.3	3.0	136.4	88.0
201112062100	11.8	4.8	5.1	13.3	2.7	56.9	54.0
201112071100	24.9	2.1	3.6	22.5	1.8	85.5	49.3
201112071900	32.6	4.4	6.4	35.3	3.1	69.5	47.6
201112072300	39.2	3.8	6.4	43.4	3.6	93.7	55.2
201112121800	24.7	4.6	4.9	40.5	2.1	45.4	43.0
201112162000	29.1	3.8	4.0	52.1	1.7	44.7	42.3
201112170700	29.3	2.0	2.2	55.4	1.8	88.2	81.8
201112170800	32.4	3.1	3.4	57.4	2.0	64.9	60.4
201112171000	37.4	3.9	4.4	62.0	2.9	74.9	66.6
201112171400	41.8	4.3	4.8	66.8	2.2	50.0	44.9
201112171700	47.3	5.2	6.0	71.2	2.9	55.5	47.7
201112220300	71.8	2.3	4.0	94.7	1.6	71.8	40.5
201112242300	67.9	2.1	2.7	118.4	1.5	70.4	55.3
201112250000	70.9	3.0	3.7	120.0	1.6	52.8	43.0
201112300800	63.0	3.4	3.7	130.8	2.4	72.1	65.3
201112300900	65.7	2.7	3.0	132.3	1.5	54.9	49.9
201112301900	70.2	3.2	3.9	137.4	3.6	112.4	93.5
201112302000	76.2	6.0	6.7	140.4	3.0	50.0	45.0
201112310300	84.2	2.7	3.5	144.9	1.9	70.7	54.5
201112311900	90.3	2.6	4.1	156.3	2.4	91.2	57.9
201201041000	63.8	2.0	2.1	165.8	1.6	76.8	72.9
201201060800	77.9	2.8	3.0	184.4	3.0	106.1	97.5
201201061300	87.6	3.2	3.5	192.3	1.6	50.5	46.8
201201062200	97.2	2.0	2.4	202.6	1.8	90.1	75.3
201201071900	103.2	2.4	3.4	211.6	3.4	144.7	100.0
201201072000	105.7	2.5	3.7	215.4	3.7	149.6	101.4
201201072300	111.2	2.5	3.3	222.5	2.3	93.2	70.7
201201080500	121.9	5.4	6.6	235.0	3.3	61.7	50.6
201201080600	127.8	5.9	7.7	239.4	4.4	74.2	56.8
201201080700	133.8	6.0	8.0	243.4	4.0	66.5	49.9
201201080800	139.6	5.8	7.8	246.7	3.3	56.6	42.1
201201080900	143.7	4.0	6.0	249.4	2.7	66.8	44.6
201201081200	146.8	3.2	4.6	253.2	1.5	46.4	32.3
201201081300	149.5	2.7	4.5	255.1	1.9	70.0	41.7
201201081500	152.9	4.9	7.4	259.0	2.8	56.8	37.9
201201081600	156.0	3.1	6.0	262.0	3.1	99.7	50.6
201201081700	161.2	5.2	9.1	266.0	4.0	76.3	43.7
201201082100	164.1	2.4	5.2	272.2	2.4	100.0	47.4
201201130600	142.0	2.1	2.9	313.9	2.9	140.8	101.0
201201131800	141.5	3.9	4.6	322.8	4.0	100.8	85.3
201201200400	121.7	4.9	6.3	291.9	8.5	171.8	134.7
201201200500	126.3	4.5	5.5	297.6	5.7	126.2	103.3
201201200600	132.3	6.1	7.3	303.8	6.2	101.8	84.5
201201200800	140.3	4.4	5.7	315.8	5.3	121.1	93.0
201201201000	147.1	4.0	5.4	326.6	5.3	132.3	99.0
201201201100	150.5	3.4	4.6	331.2	4.6	134.4	100.2
201201201700	153.5	4.2	4.6	342.4	2.0	47.2	42.7
201201202200	159.4	3.0	3.9	354.7	3.8	125.3	95.4
201201202300	162.3	2.9	3.8	358.0	3.3	112.6	86.7
201201210000	165.8	3.5	4.5	361.8	3.8	109.5	83.8
201201210100	168.8	3.0	4.1	365.4	3.5	118.0	87.2
201201211600	171.3	2.8	3.9	385.9	2.8	98.9	72.3
201201220400	165.6	2.7	3.3	407.1	3.3	124.7	99.4
201201231300	163.8	2.1	2.4	444.5	2.7	130.5	112.9
201201231800	170.5	2.3	2.7	452.0	2.9	127.4	109.3
201201240700	186.0	5.6	6.2	473.5	4.2	75.5	68.2
201201240900	190.1	2.8	3.1	477.4	1.9	67.4	60.5
201201241000	193.3	3.1	3.6	479.9	2.5	78.7	68.9
201201241700	196.4	2.3	2.6	488.8	1.8	80.0	70.8
201202091800	160.0	3.3	3.4	480.0	2.1	63.6	62.4
201202151200	168.3	2.6	3.1	422.1	3.4	133.5	111.0
201202151300	173.6	5.3	5.7	424.5	2.4	44.7	41.5
201202191600	182.8	2.4	2.8	486.9	3.0	123.7	106.2
201202191700	185.7	2.9	3.3	489.6	2.7	94.1	83.6
201202191900	189.0	2.3	2.6	494.0	2.3	101.3	89.0
201202261400	172.2	3.9	4.0	546.1	2.4	61.5	59.6
201202261600	174.7	2.0	2.1	550.2	1.6	80.0	76.9
201202262100	181.4	3.7	3.9	559.8	3.2	86.5	82.8
201202270200	187.9	3.8	4.1	566.3	4.5	116.7	109.9
201202270300	191.7	3.8	4.0	569.9	3.6	96.3	91.0
201202270400	197.7	6.0	6.3	573.4	3.5	58.8	56.5
201203051100	156.6	2.3	2.4	582.5	3.9	171.3	166.8
201203051200	159.5	2.9	2.9	584.1	1.7	57.8	56.8
201203192200	149.8	2.3	2.4	590.8	1.7	72.6	71.5
201203312200	111.8	2.3	2.3	434.2	3.7	159.6	157.1
201203312300	114.1	2.3	2.4	436.9	2.7	115.9	114.1
201204080500	105.6	3.7	3.8	378.0	2.7	71.9	70.9
201204241400	98.0	2.0	2.0	363.2	2.2	111.5	109.4
201205161600	5.9	5.4	5.5	14.6	3.2	59.8	59.2
201210151800	4.7	4.3	4.3	14.5	6.1	143.6	142.2
201210272100	6.3	3.1	3.1	11.7	2.0	63.5	63.0
201210272200	8.3	2.0	2.1	13.3	1.6	78.8	76.7
201210272300	10.4	2.1	2.2	14.9	1.6	77.6	73.2
201210280000	14.6	4.2	4.5	17.6	2.7	64.0	59.6
201210290300	21.6	2.5	3.1	26.9	2.3	92.0	75.1
201211020900	10.0	4.6	4.7	24.2	2.2	48.3	47.8
201211050400	5.9	2.9	3.0	13.9	2.8	96.3	95.3
201211050500	9.5	3.6	3.7	18.3	4.4	121.2	118.7
201212042300	26.9	2.8	3.4	35.2	2.0	73.6	59.6
201212102200	57.7	4.3	5.7	72.2	2.2	51.2	38.3
201212102300	60.1	2.4	3.8	73.8	1.6	66.7	42.5
201212280600	44.3	6.0	6.1	119.5	3.5	58.3	57.4
201212280700	47.2	2.9	3.0	122.1	2.6	87.7	84.6
201301291300	87.3	2.7	3.0	200.4	1.7	63.0	57.3
201302010200	72.2	3.9	4.0	225.3	4.4	112.0	108.9
201302010400	75.8	3.2	3.3	230.3	3.4	105.3	102.0
201302010700	77.3	2.0	2.1	233.6	1.9	91.2	88.5
201302020800	77.5	2.8	2.8	247.8	1.9	68.6	67.2
201302021200	83.0	2.9	3.0	255.3	3.3	112.8	109.2
201302022100	94.1	2.7	2.8	269.1	2.5	95.5	92.0
201302022200	96.9	2.8	2.8	270.7	1.6	57.8	56.2
201302022300	99.4	2.5	2.6	272.5	1.9	73.5	70.8
201302030100	103.2	3.2	3.5	279.1	5.1	160.3	148.6
201302031200	108.3	3.9	4.0	286.5	2.2	56.4	54.5
201302040400	110.6	2.3	2.5	294.8	1.7	71.7	68.1
201302060100	109.1	3.1	3.2	322.8	2.3	72.3	70.2
201302071100	116.0	4.0	4.1	330.0	2.0	51.1	49.8
201303122300	77.4	2.1	2.1	323.9	3.4	165.7	164.3
201303142300	102.9	2.6	2.6	347.0	1.8	70.4	69.6
201303181700	95.4	2.3	2.4	354.3	2.5	107.3	105.5
201303182000	99.0	3.4	3.5	357.9	1.7	49.4	48.8
201303182300	103.5	2.2	2.3	361.6	1.5	67.0	65.9
201303301900	103.1	4.6	4.7	366.4	2.4	51.2	50.5
201303302000	105.3	2.2	2.2	368.3	1.9	87.6	85.8
201401241000	58.6	4.2	4.3	160.0	4.0	95.2	92.2
201401241300	65.7	4.4	4.5	164.7	2.3	53.7	51.9
201401241400	69.3	3.6	3.7	166.7	2.0	56.0	53.6
201401260400	85.2	4.4	4.8	179.7	2.3	52.8	48.8
201401260800	85.2	2.1	2.5	182.0	2.3	113.1	94.7
201401270400	86.2	2.0	2.4	189.0	2.7	133.5	109.1
201401271600	89.9	3.1	3.4	196.0	1.7	53.2	48.7
201402072000	70.0	3.7	3.8	210.3	3.0	81.1	78.8
201402072100	73.4	3.5	3.6	213.0	2.7	77.2	74.7
201402072200	77.8	4.4	4.7	220.0	7.0	159.1	149.1
201402072300	83.9	6.1	6.2	222.7	2.7	44.0	42.7
201402090600	86.0	4.1	4.3	228.3	4.0	98.5	92.6
201402090700	88.8	2.8	3.0	231.3	3.0	108.3	100.0
201402091000	94.1	2.4	2.6	239.0	2.7	112.7	102.4
201402110600	93.7	3.4	3.6	242.7	2.3	68.2	64.2
201402170500	96.2	2.3	2.5	262.0	2.0	85.8	81.2
201402211800	90.0	2.6	2.8	266.7	3.3	127.0	120.4
201403051100	95.9	3.6	3.7	291.3	1.7	46.1	45.0
201403230300	43.9	2.5	2.6	157.7	1.7	66.0	65.2
201403230600	49.8	3.9	3.9	164.3	3.0	77.5	76.4
201403231300	62.4	4.1	4.2	177.7	3.0	72.6	70.7
201403231400	64.7	2.3	2.4	179.7	2.0	87.0	83.4
201403240400	81.5	4.2	4.4	195.7	2.0	47.6	45.6
201403240500	85.0	3.5	3.7	197.3	1.7	47.4	44.9
201404090500	4.9	2.8	2.9	8.0	4.0	142.9	139.7
201404150000	7.5	4.1	4.1	11.7	3.3	82.1	81.0
201404150100	10.9	3.4	3.6	14.0	2.3	67.9	63.9
201404161600	15.5	3.9	4.0	23.0	1.7	42.8	41.3
201405142000	7.1	4.8	4.9	21.0	3.3	68.8	68.1
201410220700	8.3	2.4	2.4	16.0	2.0	83.3	82.0
201410221900	18.6	2.9	3.5	23.0	2.0	69.7	57.9
201410222200	22.9	2.1	3.2	30.0	3.0	140.2	92.9
201410230000	27.4	2.9	4.6	38.0	4.7	159.4	101.4
201410230100	30.2	2.8	4.5	42.3	4.3	153.0	96.2
201410230200	33.3	3.1	5.0	47.0	4.7	152.1	93.2
201410230300	37.7	4.4	6.4	51.3	4.3	99.1	67.8
201410230700	47.8	3.5	5.0	75.0	3.3	94.3	67.3
201410230800	50.5	2.7	3.7	76.7	1.7	61.9	44.6
201412162200	10.0	2.9	2.9	19.0	1.7	57.6	56.7
201412210000	7.0	4.3	4.5	4.7	2.3	54.8	51.5
201412260500	11.1	3.4	3.7	11.3	2.0	58.8	54.1
201412260600	15.0	3.9	4.5	13.7	2.3	60.5	52.0
201412272200	19.4	3.0	3.4	24.7	1.7	55.7	49.1
201412281000	28.2	3.3	4.0	31.3	1.7	50.8	41.1
201412281400	44.3	3.7	5.3	38.3	1.7	44.5	31.3
201412281500	48.8	4.5	6.9	40.7	2.3	51.7	33.8
201412282000	57.2	3.7	5.7	47.0	1.7	45.1	29.5
201412291500	54.7	2.9	4.7	54.3	2.0	69.9	43.0
201412291600	57.6	2.9	5.3	57.0	2.7	92.1	50.0
201412291700	61.0	3.4	6.0	59.7	2.7	79.2	44.8
201412310300	85.9	3.2	6.5	82.0	1.7	51.5	25.8
201412310400	87.9	2.0	5.6	83.7	1.7	82.3	30.1
201501111700	35.7	2.0	2.1	92.0	3.0	147.1	141.3
201501141600	33.5	3.9	4.0	75.0	1.7	43.3	42.2
201501171300	33.6	2.5	2.6	89.3	1.7	66.4	65.0
201501171600	39.9	3.7	3.7	96.0	1.7	45.6	44.6
201501270700	61.3	2.1	2.4	126.7	2.0	95.2	84.0
201501270900	65.1	4.0	4.5	130.7	3.3	83.5	74.5
201501271700	76.4	3.7	4.3	141.3	2.7	72.5	61.6
201501290400	74.4	2.9	3.3	155.0	2.0	69.7	61.0
201501300700	79.0	4.7	5.0	172.3	2.7	57.0	53.0
201502011400	75.2	2.0	2.1	187.7	1.7	82.3	77.8
201502011500	79.1	3.9	4.1	190.3	2.7	68.2	64.9
201502011600	83.7	4.6	4.8	193.0	2.7	58.0	55.1
201502021100	90.8	3.5	3.8	200.0	2.3	66.6	61.1
201502080900	83.1	5.8	6.0	214.7	3.3	57.6	56.0
201502081000	87.3	4.2	4.4	217.7	3.0	71.9	68.9
201502081200	90.3	4.0	4.2	221.7	3.0	75.8	72.1
201502241400	77.5	2.0	2.1	245.3	2.0	100.0	97.3
201503021200	82.9	4.8	4.9	270.0	3.3	68.9	67.7
201503021400	88.6	3.4	3.4	273.0	1.7	49.7	48.7
201503021800	94.4	2.5	2.6	275.0	3.0	121.5	115.3
201503040700	96.1	2.3	2.5	275.3	3.0	128.8	121.5
201503040800	98.2	2.1	2.2	277.0	1.7	78.4	75.1
201503042000	99.7	3.2	3.3	278.0	2.0	62.5	60.5
201503050400	107.4	4.1	4.3	282.3	2.3	56.4	54.3
201503051500	114.0	3.4	3.6	289.7	2.7	78.5	73.2
201503110900	92.6	2.4	2.5	288.7	3.3	140.9	134.4
201503270200	80.5	2.9	3.0	317.0	1.7	57.0	56.3
201503301300	74.1	2.9	2.9	315.7	2.3	81.8	80.9
201504010600	75.6	4.2	4.2	300.7	3.7	88.0	87.1
201504010700	79.4	3.8	3.9	303.0	2.3	60.8	60.2
201504021300	87.7	2.2	2.2	311.3	1.7	75.5	74.1
201504021600	93.3	3.7	3.8	321.7	6.0	160.9	157.2
201504021700	95.3	2.0	2.1	324.3	2.7	131.0	127.8
201504052100	108.4	2.2	2.2	347.0	1.7	77.0	75.3
201504061400	113.0	4.3	4.4	352.0	2.0	46.5	45.7
201504061500	117.1	4.1	4.2	355.0	3.0	72.6	70.6
201504062000	122.3	3.8	3.9	359.0	2.0	53.2	51.8
201504231300	25.6	2.1	2.1	122.0	2.0	95.2	94.3
201504231400	29.2	3.6	3.7	123.7	1.7	46.0	45.5
