# Supplementary material for: Obtaining sub-daily new snow density from automated measurements in high mountain regions
Source: Copernicus journal article supplement (doi:10.5194/hess-22-2655-2018), 2018-05-04
Supplement: Supplementary file 4 [file hess-22-2655-2018-supplement.zip › Supplement/kuehtai_19870227_20150520.txt]

date[yyyymmddHHMM]	HS[cm]	HN[cm]	HN_corr[cm]	SWE[mm]	HNW[mm]	density[kgm-3]	density_corr[kgm-3]
199004120000	107.0	3.3	3.4	302.0	2.0	60.1	58.2
199004151700	104.7	3.7	3.8	316.0	2.0	54.5	53.0
199004180700	100.3	2.3	2.4	320.0	2.0	85.8	83.8
199004181300	102.0	3.7	3.7	322.0	2.0	54.5	53.4
199004250000	98.0	4.0	4.1	326.0	2.0	50.0	49.1
199011271800	28.7	2.7	2.7	66.0	2.0	74.9	72.9
199101010300	38.3	2.0	2.0	122.0	2.0	100.0	98.2
199101011600	44.0	2.0	2.0	128.0	2.0	100.0	97.9
199101060900	47.7	2.0	2.0	146.0	2.0	100.0	97.9
199101071500	45.7	2.0	2.0	148.0	2.0	100.0	98.1
199103271600	39.7	3.7	3.7	182.0	2.0	54.5	54.0
199105120600	41.3	5.3	5.4	152.7	2.7	50.1	49.6
199112171500	32.3	2.3	3.1	48.0	2.0	85.8	63.9
199112181200	46.3	2.7	4.9	58.0	2.7	100.4	54.8
199112181700	49.7	2.7	3.9	64.0	2.0	74.9	51.6
199112181800	55.3	5.7	7.6	67.3	3.3	58.8	44.0
199112191400	75.4	5.2	9.3	86.0	2.7	51.3	28.6
199202041600	95.7	3.3	3.5	234.0	2.0	59.9	56.6
199202042000	121.4	4.1	4.8	241.3	2.0	48.3	41.4
199202050900	121.5	2.3	2.9	254.0	2.0	86.2	69.8
199202132200	115.3	2.0	2.3	282.0	2.0	100.0	87.7
199203240000	211.7	6.9	8.6	434.0	3.3	48.1	38.7
199204010800	217.2	3.0	4.1	464.0	2.7	89.6	64.5
199204010900	219.4	2.3	3.2	466.0	2.0	87.0	61.9
199204300700	178.7	3.7	4.0	460.0	2.0	54.5	50.2
199210211700	9.3	4.7	4.8	16.0	2.0	42.5	42.0
199210290500	28.7	5.0	5.6	38.7	2.0	40.0	35.5
199210290600	32.0	3.3	5.1	42.7	4.0	120.1	77.8
199211131800	31.0	2.0	2.4	52.0	2.0	98.5	84.0
199211161600	35.8	2.4	2.9	63.3	2.7	112.7	91.0
199211170900	48.9	5.7	6.7	73.3	3.3	58.5	49.9
199211200800	54.7	3.0	3.6	96.0	2.0	66.0	56.3
199212031800	55.0	2.7	3.0	112.0	2.0	74.9	66.8
199212032000	62.0	2.7	3.4	115.3	2.7	99.6	78.2
199212032100	65.3	3.3	4.0	117.3	2.0	60.1	49.9
199212032200	68.7	3.3	4.2	119.3	2.0	59.9	48.1
199212032300	71.0	2.3	3.6	122.0	2.7	114.6	75.1
199301270700	88.0	2.0	2.2	201.3	2.0	100.0	89.3
199302191900	108.4	4.0	4.4	230.0	2.0	49.6	45.4
199303250800	117.3	4.7	4.9	286.0	2.0	42.9	41.1
199303252000	131.0	5.0	5.3	294.0	2.0	40.0	37.8
199304061100	124.0	3.0	3.3	326.0	2.0	66.7	61.5
199304111000	145.0	5.0	5.5	354.7	2.7	53.4	48.5
199304170800	147.0	5.0	5.2	382.0	2.0	40.0	38.1
199304180400	148.3	3.0	3.3	390.0	2.0	66.7	61.2
199312112300	55.3	2.3	3.9	64.0	2.0	85.8	51.2
199312141500	55.0	2.0	3.7	72.0	2.0	100.0	53.3
199312160900	67.0	3.7	5.8	80.0	2.0	54.5	34.6
199312211300	58.0	3.0	3.7	104.0	2.0	66.7	54.3
199312241500	70.0	4.7	5.6	112.0	2.7	57.2	47.6
199401010300	77.3	4.3	5.3	132.0	2.0	46.2	38.0
199401022100	86.7	3.3	4.6	146.0	2.0	59.9	43.9
199401080400	89.3	3.3	4.3	164.0	2.0	60.1	46.2
199401261200	97.7	4.3	5.3	187.3	3.3	76.7	63.2
199403012100	106.0	2.0	2.5	240.0	2.0	100.0	81.4
199403040300	114.7	2.7	3.5	252.0	3.3	124.7	95.8
199403040500	120.0	4.0	4.5	254.0	2.0	50.0	44.4
199403040600	124.0	4.0	4.6	256.0	2.0	50.0	43.8
199404012000	80.0	4.3	4.5	220.0	3.3	76.9	74.0
199404012100	82.0	2.0	2.1	222.0	2.0	100.0	94.3
199404122200	95.3	2.0	2.2	246.0	2.0	100.0	92.9
199405052100	44.7	3.3	3.4	118.0	2.0	59.9	58.5
199411301500	3.3	3.3	3.4	34.0	2.0	60.1	59.4
199412100300	19.3	2.0	2.1	42.0	2.0	100.0	95.7
199412302300	45.7	6.0	6.5	82.7	3.3	55.7	51.8
199501110700	121.0	4.7	9.4	157.3	2.7	57.0	28.3
199501232300	101.7	2.3	3.1	200.0	2.0	85.5	64.7
199501262300	112.7	6.7	7.4	237.3	3.3	49.9	45.2
199501290100	116.3	2.0	2.5	252.0	2.0	100.0	79.4
199502180500	128.0	5.0	5.6	282.7	2.7	53.4	47.5
199502180600	130.0	2.0	2.5	284.7	2.0	100.0	79.5
199502180700	132.7	2.7	3.2	286.7	2.0	74.9	62.6
199503032300	132.7	4.3	4.6	326.0	2.0	46.1	43.6
199503152200	135.7	3.3	3.6	350.0	2.0	59.9	56.0
199503160600	150.0	2.7	3.0	358.0	2.0	74.9	66.7
199503200100	149.0	3.3	3.7	379.3	2.7	79.9	72.2
199503271900	142.7	2.0	2.1	398.0	2.0	100.0	93.9
199503290500	154.3	4.0	4.2	408.0	2.0	50.0	47.9
199504010600	175.3	3.0	3.3	444.0	2.0	66.7	60.1
199504011000	185.7	2.7	3.2	448.0	2.0	74.9	62.5
199504011400	196.0	3.0	3.9	456.7	2.7	89.0	68.7
199504011500	199.0	3.0	4.0	459.3	2.7	88.7	67.1
199504011600	201.3	2.3	3.1	461.3	2.0	85.8	64.0
199504011700	203.7	2.3	3.2	463.3	2.0	85.5	62.6
199504260500	138.0	3.0	3.1	414.7	2.0	66.7	63.8
199504260600	140.7	2.7	2.8	416.7	2.0	74.9	71.0
199504260700	142.7	2.0	2.2	418.7	2.0	100.0	92.7
199504260800	145.3	2.7	2.8	420.7	2.0	75.2	70.5
199505140000	70.3	3.3	3.4	206.0	2.0	60.1	58.7
199505190200	46.0	2.0	2.0	178.0	2.0	100.0	98.7
199508292200	24.7	3.0	3.7	34.0	2.0	66.7	53.7
199508300000	31.3	3.7	5.0	36.7	2.0	54.6	40.4
199612021600	77.0	4.3	6.7	88.0	2.0	46.2	29.6
199612021700	79.0	2.0	4.7	90.0	2.0	100.0	42.8
199702262000	96.0	2.0	2.6	192.0	2.0	100.0	76.7
199702270700	105.0	2.7	3.3	200.0	2.0	74.9	59.9
199703060200	92.7	2.7	3.0	210.7	2.0	74.9	65.6
199703060400	99.7	2.0	2.5	214.3	2.0	100.0	80.8
199703190300	86.7	2.7	2.9	233.3	2.7	99.6	93.0
199704040400	103.3	2.0	2.1	290.0	2.0	100.0	93.6
199704052200	120.3	2.0	2.3	308.0	2.0	100.0	88.5
199704061100	134.0	3.0	3.6	323.3	3.3	111.0	92.5
199704200800	114.3	2.3	2.4	334.0	2.0	85.8	82.3
199712011700	30.0	3.7	4.6	36.0	2.0	54.5	43.2
199712022300	30.0	2.3	3.1	40.0	2.0	85.8	64.2
199712030000	34.0	4.0	4.9	42.0	2.0	50.0	41.0
199712030100	36.7	2.7	4.0	44.7	2.7	100.0	66.5
199712030200	39.7	3.0	4.2	46.7	2.0	66.7	48.1
199712030300	44.0	4.3	5.9	49.3	2.7	61.4	45.0
199712030500	50.7	3.7	5.3	52.0	2.0	54.5	37.7
199712130900	64.7	2.3	4.0	90.0	2.0	85.5	50.0
199712131000	68.0	3.3	5.1	92.0	2.0	60.1	39.2
199801030000	68.7	5.0	5.6	130.0	2.7	53.4	47.7
199801040100	70.0	2.3	3.2	132.7	2.7	114.6	82.9
199801040200	72.0	2.0	2.7	134.7	2.0	100.0	73.6
199801050400	78.3	3.3	4.1	139.3	2.0	60.1	48.6
199801161600	75.3	3.3	3.7	160.0	2.0	60.1	54.2
199802221900	73.3	2.3	2.5	188.0	2.0	85.8	79.9
199803151800	104.3	2.0	2.3	242.0	2.0	100.0	87.3
199803210300	119.3	2.0	2.3	272.0	2.0	100.0	86.0
199804060100	87.3	2.7	2.8	258.0	2.0	75.2	72.6
199804072100	96.0	2.0	2.2	271.3	2.7	133.0	123.3
199804072200	99.3	3.3	3.5	274.0	2.7	80.2	76.1
199804172300	107.0	3.7	3.8	302.0	2.0	54.5	52.8
199804281700	86.3	2.7	2.8	251.3	2.7	100.0	95.3
199810302300	13.0	2.0	4.1	6.0	2.0	100.0	48.9
199811041800	18.0	3.0	3.7	20.0	2.0	66.7	54.4
199812140500	52.0	2.0	2.3	102.0	2.0	100.0	85.1
199812140700	56.3	2.3	2.8	104.0	2.0	85.8	70.5
199901030900	59.0	2.0	2.4	118.0	2.0	100.0	84.8
199901090100	72.3	4.0	4.6	130.0	2.0	50.0	43.5
199901120600	70.0	3.7	4.0	134.0	2.0	54.5	49.5
199901262200	70.0	3.7	4.1	140.0	2.0	54.5	49.2
199901281800	103.0	4.7	6.6	164.7	2.7	57.2	40.7
199902091800	139.7	2.0	3.0	257.3	2.0	100.0	67.1
199903050300	160.0	2.3	2.6	416.0	2.0	85.8	77.7
199903050800	165.7	3.7	3.9	424.0	2.0	54.5	50.9
199903052200	170.0	2.3	2.6	430.0	2.0	85.8	77.6
199904071700	131.7	2.0	2.1	460.0	2.0	100.0	97.3
199910040300	8.4	2.3	2.8	8.0	2.0	85.8	72.0
200003011600	135.5	3.8	4.0	344.0	2.0	53.3	49.6
200003100600	133.6	2.0	2.2	372.0	2.0	100.0	91.1
200003150300	134.8	2.7	2.9	375.3	3.3	124.7	112.9
200003162100	152.4	3.9	4.3	396.0	3.3	84.9	77.4
200003162300	158.4	2.6	3.0	402.0	2.7	103.1	89.9
200003171300	172.3	2.3	2.8	420.0	2.0	85.8	72.7
200003171700	180.1	2.3	2.8	426.0	2.0	85.8	70.4
200003171800	185.3	5.3	6.1	429.3	3.3	63.4	54.3
200003171900	188.9	3.6	4.2	431.3	2.0	55.7	47.5
200003172000	194.3	5.3	6.2	434.0	2.7	50.1	42.8
200003172100	199.4	5.2	6.0	436.0	2.0	38.7	33.5
200003172300	203.7	2.7	3.6	441.3	2.0	74.9	56.1
200003180000	206.4	2.8	4.3	444.7	3.3	121.5	78.6
200010070600	3.9	3.0	3.0	8.0	2.0	66.7	66.1
200011040100	5.4	4.1	4.1	12.0	2.0	48.9	48.4
200011040200	9.8	4.3	4.4	14.0	2.0	46.2	45.5
200011040500	12.8	3.2	3.4	18.0	2.0	63.3	59.5
200011040800	20.8	2.7	3.8	20.0	2.0	74.9	53.2
200011211000	37.0	2.2	2.6	66.0	2.0	92.2	77.6
200012150400	44.2	3.7	4.1	87.3	3.3	90.7	80.6
200101030700	65.8	3.2	4.1	128.0	4.0	126.2	98.5
200101030800	68.2	2.4	3.0	130.0	2.0	82.6	67.2
200101072200	77.4	2.7	3.4	139.3	2.0	74.9	58.2
200101260000	81.2	3.6	4.3	165.3	3.3	92.8	77.0
200101261300	97.6	2.2	3.1	178.0	2.0	92.6	65.2
200102212300	109.0	4.2	4.6	232.0	2.0	48.0	43.5
200102231400	138.5	2.0	3.0	270.0	2.0	100.0	67.2
200102231500	141.3	2.8	4.0	272.7	2.7	97.1	66.6
200102232200	149.3	2.9	3.8	282.0	2.0	68.7	52.5
200102232300	152.2	2.8	4.0	284.7	2.7	94.0	67.4
200103050600	130.3	2.1	2.5	298.0	2.0	96.2	78.8
200103130300	123.0	3.3	3.8	312.0	3.3	100.0	87.9
200103130400	126.5	3.5	3.9	314.7	2.7	76.3	68.4
200103140100	127.4	2.3	2.6	330.0	2.0	85.5	78.0
200103140400	132.4	2.3	2.5	334.0	2.0	88.9	78.9
200104071500	116.2	2.5	2.6	384.7	2.0	80.0	77.9
200104101800	124.3	3.5	3.6	412.0	2.0	57.1	55.9
200104220100	156.3	3.8	3.8	498.0	2.0	53.3	52.2
200111222300	20.8	5.9	6.1	34.0	3.3	56.2	54.5
200111242000	38.8	2.8	3.6	56.0	2.0	70.7	55.1
200111300200	58.1	2.4	3.7	95.3	2.7	110.4	72.7
200112230100	60.6	3.4	3.5	140.0	2.0	58.7	56.9
200202062300	74.1	4.0	4.2	184.0	2.0	50.0	48.2
200202280600	118.1	4.9	5.9	255.3	4.0	81.5	67.6
200203030100	116.2	2.6	2.9	268.0	2.0	77.2	67.8
200203220200	91.2	3.3	3.5	280.0	2.7	79.9	77.4
200203220300	94.1	2.9	3.0	282.0	2.0	68.7	66.5
200203222000	110.1	3.7	3.8	292.0	2.0	54.6	52.1
200209240000	6.3	2.3	2.3	14.7	2.7	118.7	117.2
200210172200	11.4	5.2	5.3	18.0	4.0	76.5	75.0
200210172300	14.1	2.6	2.9	20.0	2.0	75.8	68.0
200210190900	17.8	5.6	5.8	29.3	4.7	83.7	80.4
200211221300	19.8	3.2	3.3	54.0	2.7	82.4	81.3
200211291100	17.8	3.9	3.9	62.0	2.0	51.9	51.4
200211291300	23.3	2.7	2.8	68.0	2.0	73.0	72.0
200211291400	27.3	4.1	4.1	70.7	2.7	65.8	64.6
200212030700	43.8	2.2	2.4	84.0	2.0	91.3	81.7
200212281600	44.0	3.0	3.1	114.0	2.0	66.2	64.2
200301042200	60.5	4.2	4.4	141.3	3.3	79.3	74.9
200301132000	70.9	3.9	4.1	152.0	2.0	51.7	48.2
200301220600	75.4	6.6	7.0	161.3	2.7	40.2	38.1
200301300900	101.9	5.0	5.4	202.0	2.0	39.8	37.0
200304020900	82.4	6.3	6.4	250.0	2.7	42.6	41.8
200304021000	84.7	2.3	2.4	252.7	2.7	115.6	110.5
200310051800	19.1	4.3	4.9	23.3	2.7	61.9	54.2
200310052100	30.5	3.6	5.4	27.3	2.0	54.9	37.1
200310052200	34.1	3.6	6.4	30.0	2.7	73.2	41.5
200310072100	28.7	4.0	5.0	43.3	4.0	98.8	80.8
200310232000	25.0	2.6	2.6	68.0	2.0	76.9	75.8
200310300100	33.4	2.6	2.7	78.0	2.0	77.5	74.4
200310301000	43.1	3.6	4.0	84.0	2.7	73.8	67.3
200311170700	49.2	2.0	2.2	114.0	2.0	100.0	91.3
200311282100	64.0	2.2	2.5	134.0	2.0	90.9	80.4
200312141900	67.1	3.4	3.5	154.0	2.0	59.5	56.5
200312290400	80.8	2.4	2.6	192.0	2.0	83.3	77.3
200401070700	101.5	3.3	4.1	212.7	2.7	80.2	65.7
200401131100	127.3	4.0	4.8	258.0	2.0	50.0	41.9
200401200500	124.4	2.5	3.0	282.0	2.0	79.1	67.6
200401200900	133.8	5.1	5.8	286.0	2.7	52.9	46.3
200401201000	137.5	3.7	4.7	289.3	3.3	89.5	70.4
200402072200	124.5	2.8	3.0	316.0	2.0	71.4	66.4
200402090100	141.3	4.8	5.0	328.7	2.0	42.0	39.7
200402090200	144.8	3.5	4.0	331.3	2.7	74.9	67.2
200402110900	151.6	3.7	4.2	352.0	2.7	73.2	64.2
200402111000	155.9	4.4	4.8	354.0	2.0	45.5	41.3
200402231100	138.9	2.2	2.3	376.0	2.0	92.2	86.2
200403212300	123.6	2.8	2.9	388.0	2.0	71.2	69.1
200404101800	130.5	4.7	4.8	410.0	2.0	42.6	41.7
200404191300	116.2	2.3	2.3	400.0	2.0	88.1	86.1
200411200000	24.7	3.7	4.1	34.0	2.0	53.8	49.1
200501022100	50.8	2.1	2.5	92.0	2.0	97.6	81.4
200501190000	55.1	2.3	2.5	110.0	2.0	88.1	78.9
200501211100	71.6	3.9	5.1	131.3	4.0	101.5	78.8
200501211200	75.4	3.8	4.8	134.7	3.3	88.8	69.1
200501211300	79.6	4.3	5.2	137.3	2.7	62.6	51.1
200501211700	88.2	2.2	3.3	146.0	2.0	90.5	60.3
200501220500	100.0	2.3	4.1	156.7	2.7	114.1	65.8
200501312300	84.6	3.1	3.5	172.0	2.0	63.9	57.0
200502010200	95.3	4.0	4.6	176.7	2.0	50.0	43.1
200502010400	104.7	3.7	4.7	180.0	2.0	54.6	42.7
200502010500	108.0	3.3	5.3	184.0	4.0	121.2	74.8
200502130100	93.3	2.8	3.2	211.0	2.0	70.2	62.3
200502130900	103.8	2.4	2.8	223.0	2.0	82.3	72.6
200512161100	35.0	3.0	3.4	62.0	2.0	65.6	59.2
200512162200	48.5	3.0	3.8	76.7	2.0	67.3	53.2
200512162300	54.0	5.6	7.8	83.3	6.7	119.8	85.0
200512170000	59.4	5.4	8.0	90.0	6.7	123.5	83.6
200512170100	63.2	3.8	5.0	92.0	2.0	52.4	40.2
200512170200	69.8	6.5	9.2	97.3	5.3	81.7	58.2
200512170300	72.6	2.9	4.7	100.0	2.7	92.7	56.2
200512170500	78.5	5.5	7.5	103.3	2.7	48.3	35.6
200512170800	89.0	5.6	8.0	109.3	2.7	47.9	33.2
200512170900	94.4	5.4	8.8	112.7	3.3	62.0	38.1
200512171100	103.3	7.0	11.0	123.3	4.0	56.8	36.3
200512171300	108.5	3.4	6.0	127.3	2.0	58.3	33.3
200512310400	86.7	3.7	4.4	160.0	2.0	54.3	45.9
200601181700	93.8	4.5	4.9	194.0	2.0	44.2	40.7
200601182200	100.9	2.0	2.6	198.0	2.0	100.0	77.8
200602161400	117.3	3.5	4.1	252.7	2.0	57.3	48.6
200602170400	122.8	5.6	6.6	260.7	4.0	71.3	60.5
200602181800	124.9	2.5	3.0	268.0	2.0	80.3	66.1
200603040800	124.2	2.8	3.4	290.7	3.3	117.2	98.1
200603050900	133.8	3.1	3.4	302.0	2.0	63.9	58.5
200603082100	145.7	2.7	3.3	320.0	2.0	73.8	59.8
200603090700	161.1	5.1	6.2	330.0	2.0	38.9	32.5
200603090800	164.8	3.7	5.2	332.7	2.7	73.0	51.7
200603100300	157.3	2.8	3.4	344.0	2.0	72.2	58.3
200603120200	160.6	5.9	6.5	353.3	3.3	56.2	51.4
200604052100	101.0	2.2	2.2	342.0	2.0	91.7	89.9
200604060000	107.0	3.1	3.2	346.0	2.7	85.0	83.3
200604102300	103.2	4.5	4.6	348.0	2.0	44.0	43.4
200604110000	105.9	2.7	2.8	350.0	2.0	73.8	72.5
200604132000	115.7	4.2	4.2	370.7	2.0	48.2	47.2
200611220000	13.8	4.6	4.6	40.7	2.0	43.8	43.4
200611220100	18.9	5.1	5.1	43.0	2.3	46.1	45.6
200612091000	18.1	2.4	2.4	58.7	2.3	99.2	98.1
200612091100	20.5	2.4	2.5	61.0	2.3	95.9	94.7
200612091200	22.9	2.4	2.4	63.0	2.0	84.4	83.1
200612091300	26.5	3.6	3.6	66.0	3.0	84.5	82.8
200612091400	29.0	2.5	2.6	68.7	2.7	106.8	103.0
200612091500	31.4	2.4	2.5	70.3	1.7	68.0	65.7
200612170600	34.0	4.4	4.5	83.0	2.7	60.7	59.3
200701011600	40.4	3.2	3.3	95.0	1.7	52.8	51.1
200701240700	46.2	4.9	5.0	124.7	2.3	47.7	47.1
200701240800	49.7	3.5	3.6	127.0	2.3	66.0	64.7
200702121900	70.1	2.6	2.8	160.7	1.7	64.0	59.1
200702122200	74.0	2.0	2.3	164.3	1.7	81.4	72.3
200702130500	80.9	3.1	3.4	168.7	1.7	54.0	49.1
200702130800	89.0	3.6	4.0	172.7	1.7	46.8	41.3
200702252000	77.3	4.2	4.4	185.7	2.0	47.2	45.3
200703020200	91.1	3.1	3.4	219.0	2.7	87.0	78.0
200703020300	94.1	3.0	3.3	221.0	2.0	65.8	59.8
200703020600	99.4	2.9	3.2	225.3	1.7	57.4	51.8
200705290600	5.0	3.4	3.5	9.3	2.0	58.1	57.6
200705290900	11.6	2.3	2.7	15.7	2.7	118.7	98.9
200705291000	14.6	3.0	3.5	18.0	2.3	78.7	66.5
200709050500	3.6	3.2	3.2	10.7	2.3	73.6	72.9
200709050800	6.6	2.0	2.1	15.3	2.7	130.4	128.7
200709051100	10.8	3.0	3.1	21.0	3.0	99.7	97.5
200709051200	13.6	2.9	3.0	24.3	3.3	116.4	109.8
200709051500	16.7	3.6	3.8	29.3	2.7	73.1	70.1
200709060800	24.1	2.1	2.5	39.0	1.7	78.8	68.1
200709280800	4.5	3.3	3.3	8.0	2.3	71.3	70.6
200709280900	8.4	3.9	4.0	9.7	1.7	42.6	41.6
200711062200	10.9	2.3	2.3	23.0	1.7	73.9	72.8
200711090700	23.4	2.8	3.0	37.7	1.7	60.7	55.4
200711101400	43.9	2.5	3.6	58.3	2.0	80.3	55.0
200711101500	46.0	2.1	3.3	60.0	1.7	79.1	51.0
200711101600	50.0	4.0	5.4	61.7	1.7	41.6	31.2
200711120000	66.6	2.8	5.2	93.3	2.7	94.7	51.5
200711120100	70.9	4.3	7.2	96.7	3.3	77.7	46.6
200711120200	73.0	2.1	4.6	99.3	2.7	126.1	58.1
200711141100	68.0	3.1	3.9	109.7	1.7	54.2	42.8
200712030500	60.3	4.0	4.2	138.7	2.3	59.1	55.9
200712031600	71.9	3.3	3.6	151.0	2.0	61.2	55.6
200712031700	74.2	2.3	2.6	153.0	2.0	88.9	76.2
200712071900	66.4	2.2	2.4	163.3	1.7	74.1	69.1
200801121900	97.9	3.6	3.9	215.0	1.7	46.5	43.1
200801221100	100.9	3.8	4.1	232.3	2.3	62.0	56.3
200802042300	110.6	3.4	3.7	253.0	2.0	59.5	54.3
200802070000	118.6	5.2	5.7	262.0	2.7	51.6	46.9
200803161300	113.2	3.7	3.8	322.3	2.0	54.6	52.7
200803161400	116.5	3.3	3.4	324.3	2.0	61.3	58.6
200804030100	137.0	3.1	3.3	371.7	1.7	53.9	51.4
200804220700	144.8	2.3	2.5	435.3	1.7	70.9	67.6
200811211100	9.7	3.2	3.2	17.7	1.7	53.0	52.2
200811211200	13.6	3.9	4.1	19.7	2.0	51.3	49.3
200811211300	16.0	2.3	2.7	21.3	1.7	70.6	60.4
200811211400	18.8	2.8	3.5	23.7	2.3	84.8	67.6
200811211500	21.1	2.3	3.0	25.3	1.7	72.2	55.1
200811211800	32.2	5.4	7.1	37.7	4.0	73.7	56.7
200811211900	35.4	3.2	4.7	40.7	3.0	93.8	63.8
200811212000	38.4	3.0	4.3	43.0	2.3	78.7	54.7
200811220100	42.5	3.1	4.5	47.3	2.7	85.5	59.4
200812010700	34.4	3.3	3.5	71.7	2.7	80.7	76.4
200812010800	36.8	2.4	2.6	73.7	2.0	85.1	78.2
200812011100	40.7	2.6	2.9	77.0	2.0	75.5	68.0
200812011700	54.4	3.3	4.1	84.0	1.7	50.9	41.0
200812051800	50.5	5.4	5.8	90.7	2.3	43.6	40.5
200901231800	92.4	8.5	9.3	194.7	5.3	62.9	57.2
200902110500	102.5	3.8	4.0	220.0	1.7	44.3	41.5
200902171100	111.4	2.5	2.8	241.7	1.7	67.6	59.5
200902171200	113.5	2.1	2.5	243.3	1.7	79.4	67.5
200902171300	115.9	2.4	2.9	245.3	2.0	82.6	69.2
200902171800	128.6	3.4	4.1	253.7	2.0	58.1	48.6
200903110500	137.4	4.8	5.1	321.7	2.0	42.0	39.2
200903121900	145.0	3.0	3.5	332.3	1.7	54.4	47.9
200903122000	147.2	2.2	2.8	334.3	2.0	90.5	72.0
200903122100	150.3	3.0	3.7	336.3	2.0	65.8	54.6
200903240500	137.6	5.0	5.3	361.0	3.7	72.8	69.0
200904292300	61.1	2.4	2.4	250.0	1.7	69.3	68.6
200910121500	5.4	2.5	2.5	14.3	2.3	93.6	92.7
200910121800	11.1	3.0	3.1	21.0	3.7	123.2	118.9
200910122200	18.1	3.2	3.5	28.0	2.7	82.9	76.2
200910122300	23.6	5.5	5.9	30.3	2.3	42.6	39.2
200910132100	32.2	4.0	5.1	40.0	2.7	66.6	52.5
200910140200	40.1	3.7	5.3	47.0	2.7	71.8	50.2
200911021800	19.9	5.7	5.7	69.0	3.0	53.0	52.5
200911041000	32.2	4.4	4.5	83.7	4.7	105.7	102.7
200911302100	39.7	2.8	2.9	106.0	2.3	83.5	81.3
200911302200	42.8	3.1	3.2	108.3	2.3	75.4	73.2
200911302300	44.9	2.1	2.2	110.3	2.0	95.7	91.3
200912080700	53.9	5.5	5.7	133.7	2.7	48.5	47.0
200912080800	56.5	2.6	2.8	136.0	2.3	88.9	82.6
200912080900	59.6	3.1	3.3	138.7	2.7	87.0	80.3
200912231100	69.6	3.4	3.7	165.7	2.7	78.5	73.1
200912251200	79.2	11.4	12.0	179.7	7.3	64.2	61.0
200912251300	88.0	8.8	9.8	186.3	6.7	75.9	68.1
200912311500	86.1	3.5	3.8	199.7	1.7	47.2	44.1
200912311600	90.0	3.9	4.2	201.3	1.7	42.1	39.1
201002261000	111.6	3.2	3.6	267.3	2.7	82.6	73.6
201003302300	86.4	6.0	6.1	286.0	3.7	61.1	60.1
201004011500	94.1	2.5	2.6	291.7	2.0	79.1	77.4
201004041700	91.0	2.5	2.6	302.3	2.0	79.7	78.0
201004041800	94.8	3.8	3.9	304.0	1.7	43.9	43.2
201004041900	98.4	3.5	3.6	305.7	1.7	47.6	46.7
201010200600	8.3	2.5	2.6	12.0	1.7	66.3	64.2
201011110600	21.3	2.1	2.1	44.0	1.7	81.1	77.8
201011220700	35.6	5.2	5.4	69.0	3.0	58.0	55.2
201011220800	39.0	3.4	3.8	71.3	2.3	67.9	61.2
201012012000	48.1	2.4	2.7	91.7	2.0	84.0	74.1
201012012100	55.0	6.9	7.5	95.3	3.7	53.2	48.5
201105160000	11.3	3.2	3.3	17.0	1.7	52.2	50.7
201109182000	7.0	4.2	4.2	10.7	1.7	40.0	39.6
201109182300	10.8	2.5	2.7	16.0	2.0	78.7	73.9
201109190000	13.4	2.6	3.0	18.7	2.7	102.3	88.1
201109190700	23.2	2.9	4.0	25.3	2.0	68.5	50.3
201109190800	25.5	2.3	3.6	27.3	2.0	88.1	55.4
201110081200	5.8	4.3	4.4	11.3	3.3	76.9	76.2
201110090400	17.6	2.9	3.5	21.7	2.7	92.7	75.6
201110090500	21.7	4.1	4.9	24.3	2.7	65.0	54.1
201110090600	24.1	2.3	3.1	26.0	1.7	71.4	53.1
201110090700	27.1	3.0	4.0	27.7	1.7	55.1	42.0
201112071200	19.1	2.7	3.1	24.3	1.7	62.6	53.3
201112071300	22.1	3.0	3.7	26.3	2.0	67.1	53.8
201112072100	31.9	2.1	3.9	37.7	2.7	124.8	68.5
201112072200	34.0	2.0	3.3	39.3	1.7	81.8	50.7
201112072300	36.4	2.4	4.0	41.3	2.0	81.6	49.9
201112121600	25.6	4.7	4.9	50.0	2.0	42.2	41.2
201112121800	29.9	2.3	2.7	54.0	3.0	133.3	112.6
201112161900	37.1	3.3	3.8	67.0	3.0	89.8	78.5
201112162000	39.9	2.7	3.4	70.3	3.3	122.0	97.0
201112170700	50.1	2.4	2.9	77.7	1.7	71.1	57.2
201112221600	74.2	2.7	4.5	106.3	1.7	61.7	36.8
201112240900	71.0	2.5	3.5	125.7	2.7	109.0	77.2
201112300800	66.2	2.5	2.8	135.3	2.0	79.1	70.4
201112311400	88.1	2.6	3.6	153.7	1.7	64.2	46.6
201201021800	86.5	4.3	4.9	174.3	2.3	54.4	47.4
201201021900	91.1	4.6	5.5	177.3	3.0	65.4	54.5
201201051500	92.0	2.1	2.5	189.3	1.7	80.2	65.2
201201051800	98.4	4.1	5.3	196.7	4.3	104.8	82.3
201201060000	109.9	3.2	3.8	208.7	1.7	52.2	44.0
201201082100	137.6	4.9	6.0	250.3	2.3	47.9	38.9
201201200100	108.0	5.3	5.7	267.3	3.0	56.7	52.8
201201200800	116.9	2.8	3.1	275.3	1.7	59.9	54.1
201201200900	119.0	2.1	2.5	277.3	2.0	94.3	80.2
201201201200	126.1	5.3	5.8	284.3	3.0	56.1	51.6
201201201500	132.1	2.2	2.5	290.7	1.7	76.3	66.3
201201202200	138.6	2.7	3.1	297.7	1.7	61.9	53.6
201201202300	141.4	2.8	3.3	299.3	1.7	58.9	50.4
201201240400	140.5	4.7	5.2	322.0	2.3	49.3	45.2
201201240500	143.5	3.0	3.3	323.7	1.7	56.2	50.6
201201240700	146.6	2.3	2.7	327.0	1.7	71.7	62.2
201201240800	151.3	4.7	5.2	329.0	2.0	42.2	38.5
201202151400	132.3	2.6	2.7	355.7	1.7	65.5	62.4
201204111600	114.4	2.6	2.7	403.7	1.7	63.0	62.0
201310101900	4.6	3.0	3.0	15.7	2.7	90.2	89.4
201310102000	11.7	7.1	7.2	19.3	3.7	51.5	51.0
201310102100	18.1	6.4	6.8	23.7	4.3	68.2	64.0
201310102200	22.5	4.4	5.2	26.3	2.7	60.3	51.3
201310102300	27.7	5.2	7.1	31.0	4.7	89.5	65.6
201310110200	40.5	4.0	6.5	38.3	2.7	66.5	41.0
201310110300	50.9	10.4	14.9	42.7	4.3	41.6	29.1
201310110400	61.1	10.2	21.4	50.0	7.3	72.1	34.2
201310160300	29.1	3.7	3.9	64.7	3.7	100.0	95.1
201311031300	4.2	3.1	3.1	19.0	2.7	87.0	86.1
201311091100	16.8	3.1	3.1	42.7	1.7	54.8	54.0
201311101600	18.0	4.3	4.3	44.7	1.7	39.1	38.7
201312261400	41.9	2.7	2.8	107.0	1.7	61.6	59.7
201312261500	45.7	3.8	4.0	109.7	2.7	69.9	67.2
201312261600	48.3	2.6	2.8	111.7	2.0	76.6	72.4
201312261800	53.9	3.9	4.1	117.3	2.7	68.7	64.6
201401260400	80.7	3.3	3.6	180.0	2.7	81.2	73.8
201401260600	84.8	2.8	3.1	183.3	2.0	71.4	65.0
201402072100	94.0	3.4	3.8	214.3	3.0	88.5	78.1
201403230200	65.2	2.2	2.2	240.0	1.7	77.0	76.0
201403230400	73.1	4.6	4.7	244.0	2.7	57.9	57.1
201403230500	77.2	4.2	4.2	246.3	2.3	55.7	54.9
201403230600	79.3	2.1	2.1	248.3	2.0	95.7	93.3
201403231000	88.3	2.2	2.2	252.3	1.7	76.5	73.9
201404142000	47.4	5.3	5.3	196.0	4.0	75.9	75.1
201404150100	55.7	3.9	4.0	202.3	1.7	42.2	41.8
201404150200	59.7	4.0	4.0	205.3	3.0	75.6	74.7
201404150300	66.8	7.1	7.1	208.3	3.0	42.6	42.1
201405140900	3.8	2.7	3.3	2.3	2.3	86.9	70.4
201410220500	4.9	4.4	4.4	10.0	2.0	45.6	45.2
201410220600	9.5	4.6	4.7	12.3	2.3	50.8	50.0
201410221700	20.4	4.1	4.7	21.3	2.0	48.5	42.2
201410221800	24.7	4.3	5.2	23.3	2.0	46.9	38.2
201410221900	27.2	2.5	3.7	25.0	1.7	65.7	44.6
201410222000	32.8	5.6	8.6	29.0	4.0	71.9	46.5
201410222100	42.0	9.2	13.3	33.0	4.0	43.4	30.2
201410222200	47.7	5.7	11.5	36.7	3.7	64.7	31.8
201410222300	50.3	2.6	9.0	40.0	3.3	128.1	37.0
201410230000	55.0	4.8	10.6	43.0	3.0	63.2	28.2
201411060000	23.7	4.9	4.9	88.0	3.0	61.6	61.0
201411060100	28.8	5.1	5.2	92.0	4.0	78.4	77.5
201411060200	30.9	2.1	2.2	94.7	2.7	124.8	122.4
201411060300	34.9	4.0	4.1	97.7	3.0	74.6	73.3
201411060400	38.1	3.2	3.3	99.3	1.7	51.6	50.5
201411060500	41.1	3.0	3.1	101.3	2.0	67.1	64.9
201501040300	80.4	2.2	2.4	213.0	2.3	105.9	98.4
201503021000	127.9	2.7	2.9	327.3	1.7	62.2	56.8
201503022300	137.2	2.3	2.5	338.3	1.7	71.9	65.6
201503301900	122.3	2.5	2.6	361.7	2.0	79.1	75.6
201503302000	124.3	2.0	2.2	363.7	2.0	97.6	92.2
201504300700	71.8	2.5	2.5	275.3	2.0	80.6	79.6
201505201500	33.5	4.2	5.5	41.7	2.3	56.0	42.6
