# Supplementary material for: Obtaining sub-daily new snow density from automated measurements in high mountain regions
Source: Copernicus journal article supplement (doi:10.5194/hess-22-2655-2018), 2018-05-04
Supplement: Supplementary file 4 [file hess-22-2655-2018-supplement.zip › Supplement/wattener_lizum 20101001_20150520.txt]

date[yyyymmddHHMM]	HS[cm]	HN[cm]	HN_corr[cm]	SWE[mm]	HNW[mm]	density[kgm-3]	density_corr[kgm-3]
201101200300	45.8	3.3	3.4	103.0	1.7	50.6	49.5
201103171800	56.2	2.8	2.8	161.0	2.0	72.5	70.5
201103171900	58.5	2.3	2.4	163.0	2.0	87.0	83.9
201103172000	62.7	4.1	4.2	164.7	1.7	40.3	39.4
201104121500	15.9	2.2	2.3	78.7	2.3	104.9	103.9
201104121600	18.3	2.4	2.4	81.3	2.7	110.8	109.8
201105151000	14.6	2.2	2.3	25.7	2.0	90.9	85.3
201105160000	19.4	4.4	4.6	29.0	1.7	38.0	36.5
201105272000	4.3	2.0	2.0	22.7	1.7	83.5	82.7
201105272300	13.7	2.7	2.7	27.0	1.7	62.5	61.2
201109182200	7.6	4.3	4.3	21.0	2.7	62.1	61.5
201109182300	13.5	5.8	5.9	24.3	3.3	57.0	56.3
201109190000	15.8	2.4	2.6	26.7	2.3	99.2	91.1
201109190100	19.9	4.1	4.6	30.3	3.7	89.3	80.1
201109190200	22.3	2.4	3.1	33.3	3.0	126.6	97.5
201109190700	35.5	3.5	5.6	45.0	4.0	113.3	71.3
201109190800	38.0	2.5	4.6	48.3	3.3	133.2	71.9
201109190900	40.7	2.7	4.9	51.3	3.0	111.1	61.0
201109191200	50.5	5.3	8.1	62.0	3.0	56.6	36.9
201110070900	7.2	2.8	2.8	18.7	3.0	107.1	106.1
201110072100	12.8	2.9	3.0	19.0	2.0	69.9	66.3
201110081200	18.5	5.1	5.4	25.3	2.3	45.7	43.3
201110090100	29.7	3.7	4.5	32.7	1.7	44.8	36.7
201110090400	35.4	2.3	3.8	37.0	2.0	85.5	52.5
201110090800	39.4	3.1	4.4	42.0	1.7	53.4	37.9
201110100500	36.3	2.8	4.0	46.0	1.7	59.0	41.8
201112080000	29.7	4.3	5.6	30.0	2.3	53.8	41.3
201112121800	12.5	8.6	8.7	17.7	4.0	46.3	45.9
201112162100	8.4	4.3	4.4	17.3	5.0	115.2	114.1
201112221300	32.4	3.5	4.4	40.7	2.0	57.6	45.2
201112221700	41.8	4.6	6.1	46.0	2.0	43.5	33.0
201112301000	47.5	8.8	9.4	75.7	4.3	49.3	46.1
201112311800	65.0	4.8	6.5	96.0	2.7	56.0	40.9
201201010200	71.6	3.5	5.4	107.3	2.3	67.3	42.8
201201022000	66.6	5.5	7.0	113.0	4.7	84.9	66.6
201201022100	70.8	4.2	5.4	115.7	2.7	63.6	49.4
201201030000	75.8	2.1	3.4	121.0	2.0	95.2	59.7
201201051600	72.3	2.0	2.8	131.0	2.0	98.0	72.1
201201051700	74.4	2.1	2.8	132.7	1.7	79.5	59.6
201201051900	79.9	2.7	3.7	141.0	3.3	124.7	89.2
201201052200	83.3	3.3	4.1	146.0	2.7	81.9	65.2
201201060100	89.1	2.6	3.9	149.7	3.0	113.6	77.1
201201060700	92.4	4.1	4.9	156.3	2.3	56.4	47.6
201201060900	94.9	2.1	2.9	161.0	2.0	93.9	68.6
201201061000	97.5	2.6	3.5	163.0	2.0	76.9	57.5
201201061200	102.7	3.4	4.7	168.7	2.7	77.8	56.2
201201061300	105.2	2.5	4.0	171.3	2.7	106.4	66.3
201201061400	108.1	2.8	4.5	174.0	2.7	94.0	59.9
201201061500	110.3	2.3	4.0	176.7	2.7	118.1	67.2
201201061600	112.9	2.6	4.0	178.7	2.0	77.8	49.8
201201072300	124.0	2.4	4.7	201.7	2.7	111.2	57.2
201201080100	126.7	2.4	3.9	205.0	1.7	69.6	42.9
201201081900	133.3	2.9	4.6	218.3	2.3	81.2	50.7
201201082000	135.8	2.5	4.0	220.0	1.7	66.0	42.0
201201200900	106.4	2.2	2.5	248.3	2.3	107.4	91.8
201201202300	127.4	3.9	4.3	268.3	2.3	60.4	53.8
201201210000	130.5	3.1	3.5	270.0	1.7	53.9	47.3
201201220600	129.6	2.9	3.7	286.0	3.0	103.4	81.6
201201240400	132.2	5.0	5.5	296.7	2.7	53.1	48.9
201202151100	130.7	2.6	2.8	334.7	1.7	63.3	59.9
201202151200	132.8	2.2	2.4	336.7	2.0	92.6	85.0
201202151300	135.4	2.6	2.8	338.7	2.0	76.9	71.1
201202160200	150.3	2.1	2.3	364.7	1.7	80.7	73.9
201202260900	145.8	3.1	3.2	392.7	1.7	54.6	52.1
201203050400	133.0	4.8	4.9	411.0	2.0	41.4	40.5
201203050500	137.9	4.9	5.0	414.0	3.0	61.6	59.5
201203190300	140.1	3.6	3.7	449.7	4.3	121.9	117.0
201203191300	149.4	3.0	3.1	462.0	1.7	55.7	53.8
201204060400	123.1	3.7	3.8	460.3	3.0	80.4	79.1
201204060700	130.2	4.3	4.4	467.3	2.3	54.2	53.3
201204111600	123.9	2.1	2.1	473.3	3.0	142.9	140.1
201204111700	128.5	4.6	4.7	477.0	3.7	79.3	78.1
201204111800	133.6	5.0	5.1	480.3	3.3	66.1	65.1
201204111900	136.2	2.6	2.7	482.3	2.0	76.0	74.7
201204201900	141.3	5.5	5.6	532.0	2.3	42.1	41.6
201204220600	139.3	2.7	2.7	539.3	3.0	112.4	110.6
201204220700	142.7	3.4	3.4	542.0	2.7	79.2	78.1
201204220800	145.9	3.2	3.3	544.7	2.7	83.4	82.0
201204221100	144.7	4.6	4.7	548.7	2.0	43.2	42.6
201204241100	143.5	2.9	3.0	553.0	2.0	69.0	67.7
201204241300	151.4	9.2	9.3	560.0	4.7	50.9	50.2
201204241400	156.9	5.5	5.7	565.0	5.0	90.4	88.5
201205061900	65.7	2.4	2.4	284.0	2.0	84.7	83.8
201205152100	32.4	9.8	9.9	122.0	5.3	54.4	53.9
201205152200	37.2	4.8	4.9	125.7	3.7	76.0	75.2
201205152300	41.3	4.0	4.1	127.7	2.0	49.5	48.9
201205160300	49.5	5.1	5.2	136.0	3.7	72.4	71.1
201205161700	50.6	3.2	3.3	144.3	1.7	51.9	50.9
201205161800	54.2	3.6	3.6	146.0	1.7	46.8	45.9
201205170000	58.3	2.4	2.4	151.3	1.7	70.0	68.0
201210151300	2.9	2.6	2.7	9.3	2.7	100.4	99.5
201210151400	6.9	4.1	4.1	12.7	3.3	82.3	81.5
201210151500	13.8	6.8	7.1	17.3	4.7	68.1	66.0
201210151600	21.5	7.8	8.7	21.3	4.0	51.5	45.7
201210151700	25.4	3.9	5.4	23.7	2.3	60.0	43.4
201210272000	10.5	2.6	2.8	13.7	2.0	78.1	72.6
201210272200	14.2	3.7	3.9	16.0	2.0	54.6	50.8
201210281600	27.1	3.3	4.1	23.7	1.7	51.1	40.6
201211050400	4.3	4.1	4.1	16.0	4.0	97.6	96.6
201211050600	11.5	5.5	5.5	21.0	3.7	67.2	66.5
201211050700	16.2	4.7	5.0	24.7	3.7	78.1	74.0
201212050000	23.7	4.3	4.7	28.0	1.7	39.1	35.8
201212260900	11.9	2.8	2.8	43.3	3.0	108.3	107.3
201212261000	16.2	4.3	4.4	47.3	4.0	92.4	91.5
201212261100	20.5	4.3	4.3	49.7	2.3	54.8	54.1
201212261200	24.6	4.2	4.3	52.3	2.7	63.9	62.3
201212261300	26.7	2.1	2.2	54.0	1.7	80.7	75.9
201212272200	27.2	4.1	4.2	56.3	3.3	82.0	78.9
201212280400	31.2	3.9	4.0	60.3	2.0	51.8	49.9
201212280500	36.0	4.7	5.1	63.0	2.7	56.3	52.8
201212280600	40.4	4.4	4.8	65.0	2.0	45.5	41.3
201212280800	43.2	2.1	2.8	69.0	2.0	93.5	72.0
201212281100	50.0	4.1	5.0	76.3	2.3	56.4	46.6
201301032200	32.4	3.3	3.4	72.7	1.7	51.2	49.6
201301050500	45.8	3.7	4.0	90.0	2.0	53.5	49.5
201301050700	51.0	3.4	4.0	95.7	3.0	87.5	74.1
201301050800	54.3	3.3	3.8	97.7	2.0	61.2	52.3
201301051000	57.7	3.5	4.1	101.3	2.0	57.6	48.4
201301051100	60.9	3.2	4.3	104.0	2.7	82.7	61.9
201301051300	66.2	3.7	5.2	108.3	2.7	71.3	51.6
201301051500	71.4	3.8	5.3	112.7	2.3	62.1	43.8
201301051600	74.1	2.7	4.5	115.0	2.3	85.3	51.2
201301051900	78.8	2.0	3.7	119.0	1.7	82.3	45.2
201302020800	73.4	4.4	4.6	181.7	3.0	67.7	64.6
201302020900	76.7	3.3	3.5	183.7	2.0	60.6	57.4
201302060000	104.4	3.0	3.6	223.7	3.3	110.2	93.4
201302060300	110.4	2.9	3.3	228.3	1.7	56.7	51.1
201303091700	53.4	5.3	5.3	180.0	2.0	38.0	37.5
201303181500	50.9	4.4	4.4	175.3	2.3	53.3	52.7
201303181700	54.1	2.3	2.3	179.7	2.0	87.0	85.6
201303181900	61.6	6.6	6.7	184.3	2.7	40.1	39.7
201303202000	61.1	4.6	4.7	189.3	3.3	71.8	70.7
201303202100	64.6	3.5	3.5	191.0	1.7	47.7	47.1
201303301900	68.1	2.4	2.5	215.7	1.7	68.7	67.5
201303302000	71.7	3.6	3.6	217.7	2.0	56.0	55.0
201303310200	79.3	3.4	3.4	227.0	2.0	59.5	58.2
201304191800	43.6	3.9	3.9	185.0	2.0	51.7	51.1
201304191900	48.3	4.7	4.8	187.3	2.3	49.3	48.8
201304192000	50.9	2.6	2.7	189.0	1.7	63.5	62.8
201304192300	54.1	2.3	2.4	193.7	1.7	71.4	70.5
201304200000	56.7	2.7	2.7	196.7	3.0	112.8	111.1
201305312000	20.9	5.2	5.4	37.0	4.0	76.9	73.5
201305312100	25.8	5.0	5.6	41.7	4.7	94.2	83.0
201305312200	28.8	2.9	3.7	44.3	2.7	90.5	72.4
201305312300	31.2	2.4	3.3	46.7	2.3	97.5	71.1
201306012000	24.1	2.3	2.3	69.0	1.7	72.6	71.4
201306240600	9.1	4.9	5.0	23.0	6.0	121.5	120.2
201310102200	7.7	7.3	7.4	16.7	3.3	45.8	45.4
201310102300	13.0	5.3	5.4	20.0	3.3	62.8	61.7
201310110000	17.5	4.5	4.8	22.3	2.3	52.1	48.5
201310110200	21.0	2.6	3.5	27.7	3.7	141.2	105.9
201310110400	24.9	2.3	3.0	33.0	2.7	116.1	87.7
201310110500	29.3	4.4	5.8	38.0	5.0	114.4	86.7
201310110600	34.0	4.7	5.6	40.0	2.0	42.3	35.9
201310160200	19.8	3.2	3.2	46.7	2.3	74.1	72.5
201310300800	3.6	3.0	3.0	13.0	3.3	112.1	111.1
201310300900	7.6	4.0	4.0	15.0	2.0	50.0	49.5
201311031500	3.8	3.0	3.1	14.0	2.0	66.0	65.4
201311091100	12.3	4.9	5.0	35.7	3.3	67.7	67.1
201311092000	23.5	4.7	4.8	44.7	2.0	42.8	41.8
201311142100	19.5	2.1	2.1	48.0	1.7	79.5	78.2
201311142200	22.2	2.7	2.8	50.0	2.0	73.3	71.7
201311240000	22.5	3.6	3.6	54.3	2.0	56.0	55.3
201311240400	28.2	3.7	3.8	60.7	1.7	45.1	44.2
201311240800	36.1	3.2	3.4	66.7	1.7	52.2	49.2
201311300800	50.8	3.6	3.9	94.0	2.0	56.0	51.8
201312142300	45.1	2.1	2.2	103.0	1.7	79.5	75.8
201312261700	11.5	2.4	2.4	34.0	2.0	83.3	82.5
201312261800	14.2	2.7	2.7	36.7	2.7	98.9	97.6
201312261900	16.5	2.3	2.3	38.7	2.0	87.0	85.4
201312262000	21.1	4.6	4.7	40.7	2.0	43.5	42.7
201401051100	13.6	3.7	3.8	38.7	3.0	80.4	79.7
201401051200	17.3	3.7	3.8	41.7	3.0	81.1	79.9
201401141800	27.2	4.2	4.3	59.7	1.7	39.8	39.1
201401141900	31.8	4.6	4.8	63.0	3.3	72.4	69.4
201401142000	35.9	4.1	4.3	65.0	2.0	49.1	46.5
201401241000	41.4	5.2	5.4	85.7	2.3	44.7	43.5
201401260500	49.2	2.6	2.9	94.3	2.7	103.5	91.0
201401260600	51.8	2.6	2.9	96.0	1.7	64.2	58.3
201402090700	38.8	3.3	3.4	106.0	2.7	80.9	79.5
201402090800	42.1	3.4	3.4	108.3	2.3	69.3	67.9
201402091100	50.4	3.9	4.1	114.0	2.7	68.5	65.7
201402161800	48.3	2.5	2.5	121.3	1.7	67.5	65.5
201402161900	50.7	2.4	2.5	123.0	1.7	69.6	67.2
201402170600	59.8	5.1	5.3	131.0	2.3	45.4	43.9
201402212200	65.9	4.8	5.0	148.7	2.0	41.3	39.9
201402212300	68.1	2.3	2.5	150.7	2.0	88.5	80.9
201403230400	41.9	3.9	3.9	151.3	3.0	76.9	76.1
201403230600	45.7	2.0	2.1	155.0	1.7	82.3	81.2
201403230700	49.9	4.2	4.3	157.3	2.3	55.5	54.8
201403230900	55.4	3.1	3.2	162.0	3.3	106.4	103.8
201403231100	63.8	6.6	6.7	167.7	3.3	50.6	49.6
201403231200	66.7	2.8	3.0	171.0	3.3	117.3	110.1
201403231300	69.3	2.6	2.8	174.0	3.0	114.1	106.1
201403231400	73.1	3.8	4.0	177.3	3.3	88.3	82.8
201403232000	83.5	4.5	4.7	188.0	2.0	44.4	42.5
201403232300	90.9	4.8	5.1	194.3	2.3	48.2	45.4
201403240100	94.0	3.4	3.7	197.3	1.7	48.8	45.2
201404142000	37.8	5.2	5.2	154.3	4.3	83.9	83.1
201404182100	44.3	4.1	4.1	164.0	1.7	40.7	40.4
201404182200	48.0	3.7	3.7	165.7	1.7	45.1	44.7
201405030100	6.1	2.4	2.4	38.7	1.7	69.6	68.9
201405030200	10.9	4.8	4.8	42.7	4.0	83.3	82.5
201405141000	6.1	3.1	3.1	13.7	1.7	54.6	54.0
201405142000	7.3	3.0	3.0	18.0	2.0	66.7	66.1
201405142100	14.3	7.0	7.1	21.7	3.7	52.4	51.8
201410221600	5.5	2.0	2.1	12.3	2.0	98.0	97.1
201410222100	23.0	7.4	8.4	26.0	5.3	72.3	63.3
201410222200	25.7	2.8	3.9	28.7	2.7	96.7	67.8
201410222300	30.6	4.9	6.7	32.3	3.7	74.7	54.4
201410230000	36.1	5.4	8.3	36.7	4.3	79.8	52.5
201410230100	40.6	4.6	7.9	40.7	4.0	87.7	50.8
201410230200	43.2	2.5	6.1	44.3	3.7	144.1	60.3
201410230300	47.9	4.7	8.9	48.7	4.3	91.8	48.5
201410230400	51.8	3.9	9.0	53.3	4.7	118.6	51.7
201410230500	55.1	3.3	7.9	57.3	4.0	121.2	50.4
201410230600	58.5	3.4	8.9	62.0	4.7	137.4	52.2
201410230800	62.9	2.3	6.4	69.7	3.3	145.2	52.3
201411052300	11.7	2.6	2.6	56.3	1.7	63.8	63.2
201411060200	13.3	3.6	3.7	59.0	1.7	45.9	45.4
201411060400	17.0	2.4	2.4	61.7	1.7	69.6	68.9
201411060500	19.7	2.7	2.7	64.3	2.7	99.6	98.6
201411060700	24.8	3.7	3.8	69.0	2.0	53.6	53.0
201411180600	9.8	2.9	3.0	16.7	2.3	80.7	78.8
201411180700	12.1	2.3	2.4	18.3	1.7	72.2	68.0
201412261000	8.3	2.9	2.9	17.3	1.7	57.2	56.8
201412292100	19.8	2.6	2.9	24.0	1.7	65.0	58.5
201501031900	28.0	2.3	2.5	54.0	2.3	102.6	91.7
201501032000	30.0	2.0	2.3	56.0	2.0	98.5	85.4
201501040000	31.1	2.3	2.5	62.3	2.0	88.1	80.3
201501040100	33.1	2.0	2.4	65.3	3.0	150.0	126.1
201501040200	38.7	5.6	6.3	70.3	5.0	88.8	79.0
201501040300	41.9	3.2	4.0	74.0	3.7	114.7	92.4
201501040400	45.0	3.1	3.7	76.7	2.7	86.1	71.6
201501111000	29.6	2.7	2.7	90.7	3.3	123.7	121.7
201501111200	35.5	3.4	3.5	94.0	2.0	58.8	57.9
201501141700	34.4	4.6	4.7	92.0	2.0	43.1	42.6
201501170800	28.8	2.4	2.4	87.0	1.7	70.5	69.5
201501171100	38.4	6.7	6.8	94.7	4.0	60.1	59.0
201501172200	50.1	3.5	3.7	102.3	2.3	67.3	63.5
201501272000	56.3	3.5	3.6	117.0	1.7	47.7	45.9
201501272200	60.3	2.4	2.6	120.0	1.7	68.4	63.4
201501300800	59.8	6.4	6.6	125.7	3.0	46.9	45.3
201502081600	64.2	5.3	5.5	138.7	2.7	50.4	48.9
201502240800	51.9	3.9	4.0	128.0	2.0	51.7	50.4
201502241000	55.5	2.5	2.6	131.0	1.7	66.8	63.9
201502241400	59.6	3.6	3.7	135.7	1.7	46.8	44.9
201502241500	61.7	2.1	2.3	137.3	1.7	77.9	72.4
201503270300	68.2	3.9	4.0	190.7	2.0	51.3	50.2
201503301500	71.5	2.2	2.3	209.0	2.0	90.9	87.3
201503301600	74.2	2.8	2.8	210.7	1.7	60.5	58.6
201503311900	71.8	2.4	2.5	222.0	3.0	125.0	120.6
201504010800	82.1	3.9	3.9	228.3	1.7	42.9	42.1
201504011100	85.7	2.0	2.1	232.0	1.7	81.9	78.6
201504021400	97.2	2.4	2.6	248.7	2.3	97.5	88.4
201504021900	104.2	2.5	2.8	259.7	3.7	149.2	131.5
201504061800	118.4	3.9	4.0	292.0	1.7	43.2	41.5
201504240100	60.5	4.7	4.7	221.7	2.7	57.2	56.6
201504300700	38.4	3.1	3.2	145.3	3.0	95.5	94.5
201504300800	44.1	5.8	5.8	149.7	4.3	75.3	74.4
201504301000	48.7	2.7	2.8	155.7	3.3	122.3	119.5
201505201500	18.2	5.1	5.2	34.3	3.7	72.2	70.1
201505201600	21.0	2.8	3.2	37.7	3.3	118.0	103.8
