# Supplementary material for: Obtaining sub-daily new snow density from automated measurements in high mountain regions
Source: Copernicus journal article supplement (doi:10.5194/hess-22-2655-2018), 2018-05-04
Supplement: Supplementary file 4 [file hess-22-2655-2018-supplement.zip › Supplement/weissfluhjoch_20131001_20150520.txt]

date[yyyymmddHHMM]	HS[cm]	HN[cm]	HN_corr[cm]	SWE[mm]	HNW[mm]	density[kgm-3]	density_corr[kgm-3]
201310101700	22.0	6.3	8.1	20.1	5.5	86.4	67.2
201310101800	25.0	3.0	4.9	24.1	4.0	132.0	80.6
201310102300	34.3	2.3	4.0	37.4	3.6	154.5	89.3
201310160000	25.0	2.7	2.7	57.4	1.9	72.3	70.2
201310160100	30.7	5.7	5.9	61.1	3.8	66.1	63.6
201310160200	36.3	5.7	6.3	66.3	5.2	91.2	82.4
201310160300	39.3	3.0	3.7	70.0	3.8	125.3	101.2
201310232000	13.7	4.3	4.4	64.1	4.6	106.5	105.4
201311052300	16.3	2.3	2.4	59.0	1.9	79.4	78.7
201311060000	19.0	2.7	2.7	61.0	2.0	75.3	74.5
201311090300	31.7	2.7	2.7	111.1	3.3	123.6	122.1
201311101400	34.7	2.3	2.4	125.1	2.8	117.9	116.7
201311110600	50.0	3.3	3.4	145.5	4.9	148.3	145.5
201311141500	40.7	2.3	2.4	157.0	1.8	75.2	74.5
201311141600	42.7	2.0	2.0	159.0	2.0	98.5	97.5
201311150500	53.0	2.0	2.0	168.7	1.5	75.0	74.2
201312060800	56.0	2.3	2.4	185.6	1.5	64.4	63.7
201312252000	61.7	2.3	2.4	196.8	1.5	65.8	64.8
201312252300	65.3	2.0	2.0	201.4	1.7	86.5	84.6
201312282200	71.7	2.7	2.7	221.2	2.6	97.4	95.4
201312282300	74.7	3.0	3.1	224.0	2.8	92.3	90.2
201312290000	77.7	3.0	3.1	226.8	2.8	94.3	91.8
201401041900	87.3	4.3	4.5	254.4	3.4	77.8	75.5
201401042000	89.3	2.0	2.1	255.9	1.5	75.0	72.4
201401141100	101.7	2.3	2.4	287.2	1.9	82.9	79.9
201401141500	108.0	2.7	2.8	294.6	2.2	83.5	80.1
201401260200	115.0	3.0	3.1	337.1	2.3	76.7	74.5
201401261000	127.7	3.0	3.1	358.3	2.6	86.7	84.0
201402071400	122.7	2.0	2.1	390.8	2.2	110.0	106.6
201402211700	150.7	3.0	3.1	462.6	1.7	55.7	54.4
201402211800	153.3	2.7	2.7	464.2	1.6	61.3	59.7
201403222300	134.0	2.3	2.4	498.7	1.7	71.2	70.3
201403230100	140.7	3.7	3.7	502.5	2.1	58.0	57.3
201403230200	144.0	3.3	3.4	505.2	2.6	79.3	78.1
201403230800	158.0	2.3	2.4	521.2	3.4	144.6	140.1
201404130300	135.0	2.0	2.0	532.3	2.5	123.5	121.4
201404130500	140.3	3.3	3.4	537.5	2.6	76.9	75.7
201404270400	135.0	2.3	2.4	527.0	2.6	112.9	110.8
201404300800	139.3	2.3	2.4	565.9	3.5	150.2	147.6
201404301100	143.3	2.0	2.0	572.6	1.7	83.5	82.2
201405121800	139.3	3.7	3.7	596.0	2.5	69.1	68.4
201405132100	142.3	2.7	2.7	608.2	1.7	65.0	64.4
201405132200	145.0	2.7	2.7	610.3	2.1	79.8	79.0
201405140300	147.7	2.0	2.0	615.5	2.1	107.0	105.8
201406042200	91.3	3.0	3.0	458.5	2.1	71.3	70.6
201406291600	9.7	6.0	6.1	24.5	7.7	128.0	126.7
201410221500	20.7	2.3	2.4	61.8	3.4	146.2	144.6
201410221600	24.3	3.7	3.7	64.0	2.2	59.8	59.3
201410222000	35.0	8.0	8.1	81.4	6.6	82.9	81.6
201410230500	55.3	2.0	2.3	119.7	3.0	148.5	132.0
201410230700	59.0	4.0	4.3	126.5	3.4	85.0	79.5
201411051500	42.3	3.0	3.0	139.8	2.2	72.3	71.3
201411051600	45.0	2.7	2.7	142.1	2.3	87.3	85.7
201411051700	47.7	2.7	2.7	144.4	2.3	85.0	83.3
201411051800	50.0	2.3	2.4	146.3	1.9	82.8	81.1
201411052200	56.7	3.3	3.4	153.4	2.3	68.9	67.3
201411052300	59.0	2.3	2.4	155.8	2.4	103.0	99.0
201411151900	53.0	3.0	3.1	172.2	2.5	84.3	82.9
201411152000	56.7	3.7	3.7	175.3	3.1	83.7	82.0
201411152100	59.7	3.0	3.1	178.4	3.1	103.3	100.5
201411152200	63.3	3.7	3.8	181.0	2.6	71.9	70.0
201411160200	71.3	2.0	2.1	190.1	2.7	135.0	126.4
201411160500	74.7	2.0	2.1	194.8	2.3	113.5	106.6
201411160600	77.7	3.0	3.1	196.7	1.9	64.3	61.7
201411160700	79.7	2.0	2.2	199.0	2.2	112.0	103.4
201501031700	107.3	2.3	2.4	340.4	3.9	167.4	159.5
201501031800	111.3	4.0	4.2	345.1	4.7	118.3	113.3
201501031900	114.7	3.3	3.5	349.0	3.9	115.9	110.4
201501092200	123.7	3.3	3.5	404.8	4.2	125.7	121.1
201501112300	135.3	3.7	3.7	426.3	2.5	68.3	67.3
201501141400	124.7	2.3	2.4	423.8	2.0	85.5	83.9
201501162300	127.7	2.3	2.4	427.4	2.9	123.9	120.0
201501171500	150.3	2.0	2.1	450.8	1.6	82.0	79.5
201503020500	175.0	2.7	2.7	578.9	1.7	62.5	60.9
201503020600	177.3	2.3	2.4	581.0	2.2	92.7	89.3
201503020700	180.7	3.3	3.5	583.7	2.7	79.9	77.2
201503020800	183.0	2.3	2.5	586.5	2.8	121.5	115.0
201503020900	185.0	2.0	2.1	588.9	2.4	120.0	113.4
201503022000	196.0	2.7	2.8	607.5	3.3	124.7	119.0
201503300300	182.0	2.0	2.1	654.2	2.4	120.0	116.6
201503300400	184.7	2.7	2.7	657.0	2.8	104.9	102.0
201503300500	188.7	4.0	4.1	660.2	3.2	80.0	78.1
201503300600	192.0	3.3	3.4	663.5	3.3	98.2	95.2
201503300700	194.7	2.7	2.8	665.9	2.4	91.0	88.2
201503311800	204.0	3.3	3.4	699.8	2.8	84.1	81.6
201504010300	205.7	2.7	2.7	711.3	1.7	62.2	61.2
201504010400	208.7	3.0	3.1	713.3	2.0	66.7	65.5
201504010500	211.3	2.7	2.7	716.3	3.0	112.8	109.8
201504011500	217.7	2.3	2.4	726.0	2.0	85.5	83.4
201504021400	233.7	2.3	2.5	746.0	3.3	142.3	131.9
201504021500	237.0	3.3	3.6	750.0	4.0	120.1	112.4
201504021600	239.3	2.3	2.5	753.0	3.0	128.8	120.0
201504172200	187.7	2.0	2.0	765.7	1.7	83.5	82.2
201505061000	173.7	4.0	4.1	662.1	3.6	89.0	87.3
201505150300	147.0	3.3	3.4	689.9	2.3	70.3	69.5
201505150400	151.3	4.3	4.4	692.7	2.9	66.1	65.3
201505150500	154.7	3.3	3.4	695.8	3.1	92.8	91.7
201505150600	157.7	3.0	3.0	698.4	2.6	85.7	84.6
201505191700	140.3	3.3	3.4	681.0	3.7	112.0	110.8
201505200800	158.7	3.3	3.4	686.4	2.2	65.9	65.2
