# Supplementary figures and images for: Obtaining sub-daily new snow density from automated measurements in high mountain regions
Source: Copernicus journal article supplement (doi:10.5194/hess-22-2655-2018), 2018-05-04

Wattener Lizum 01 Oct 2013 - 20 May 2015

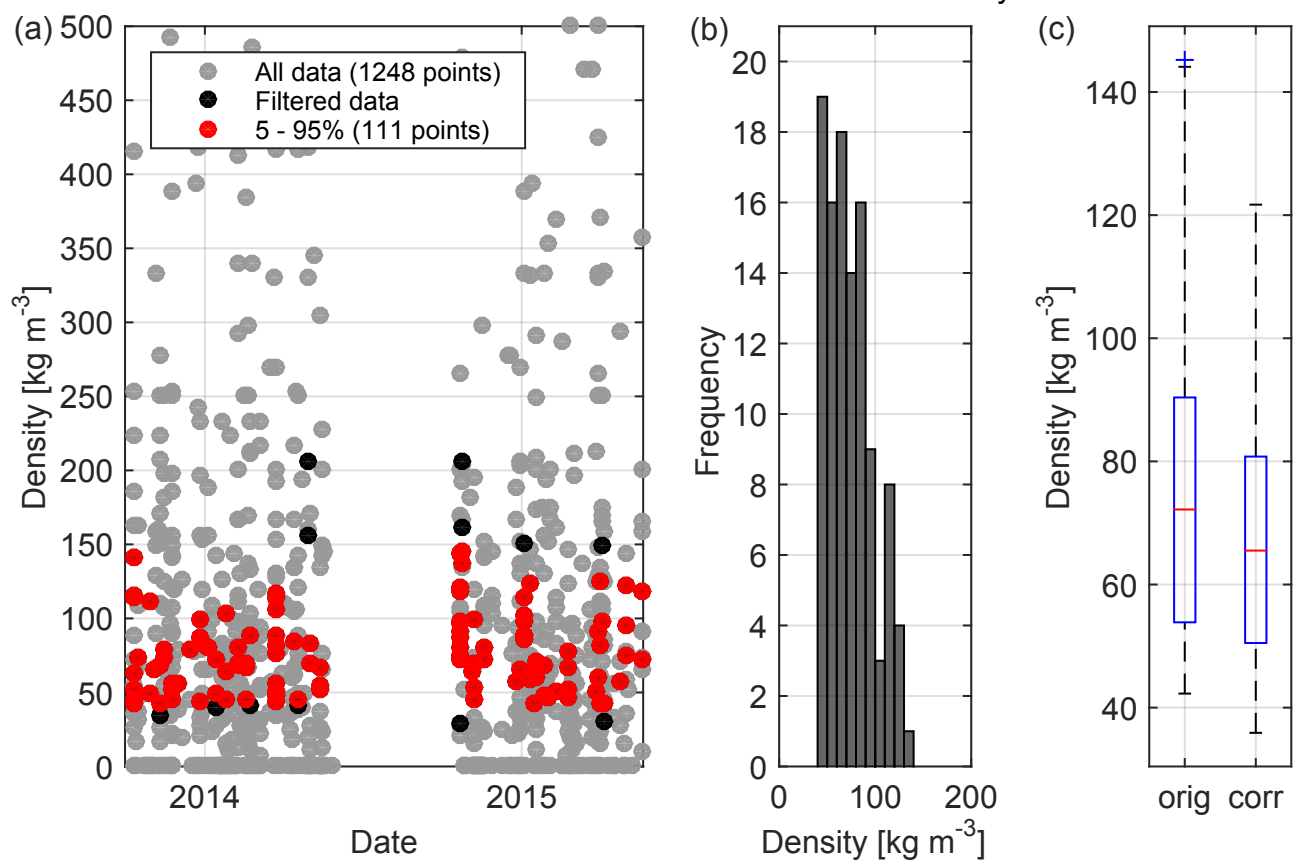

Supplement: Supplementary file 3 [file hess-22-2655-2018-supplement.zip]

Kühroint 01 Oct 2011 - 30 Sep 2013

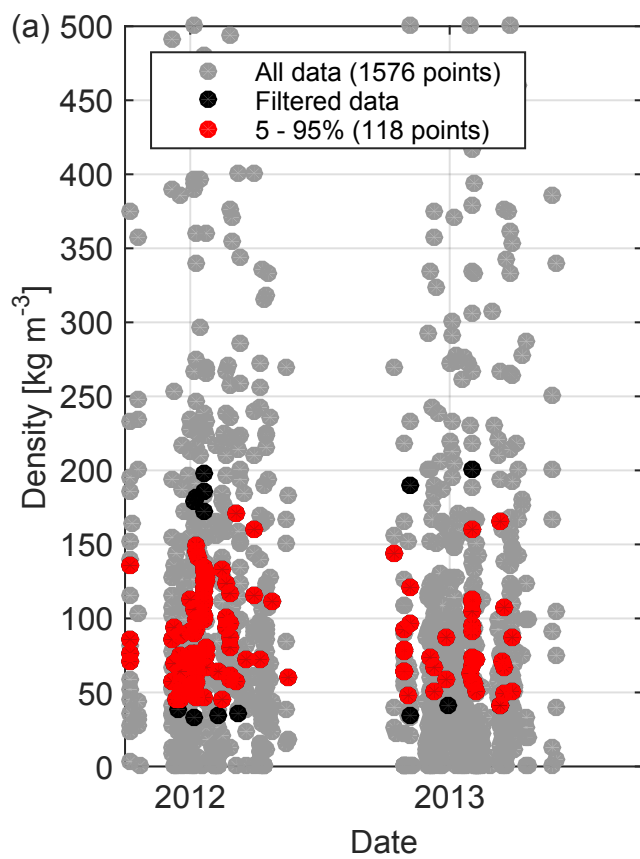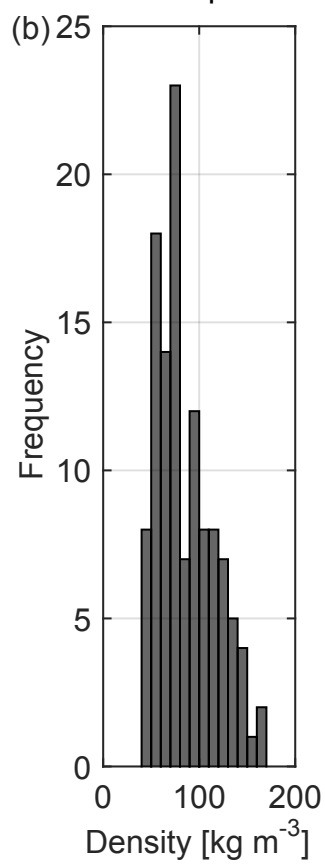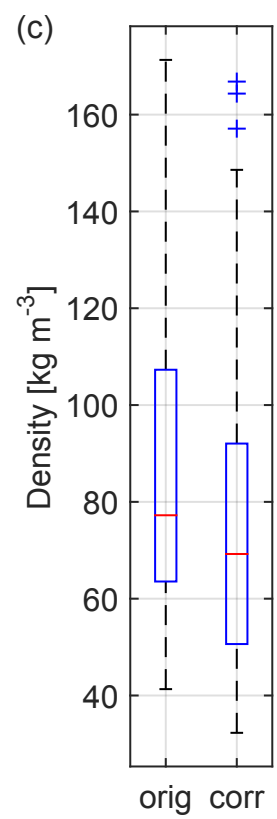

Supplement: Supplementary file 4 [file hess-22-2655-2018-supplement.zip › Supplement/S10.pdf]

Weissfluhjoch 01 Oct 2013 - 20 May 2015

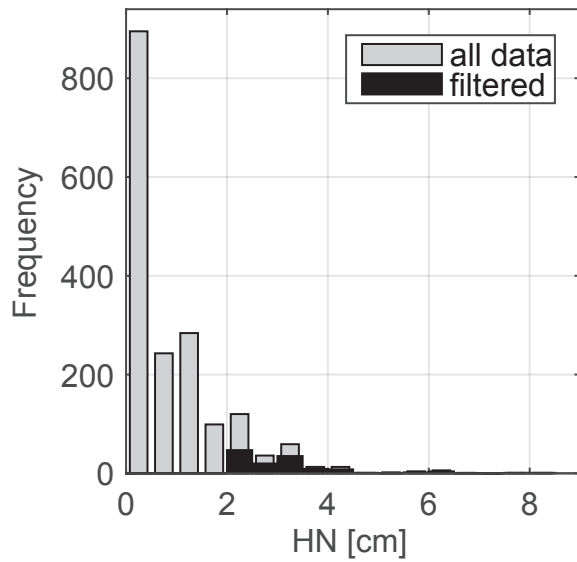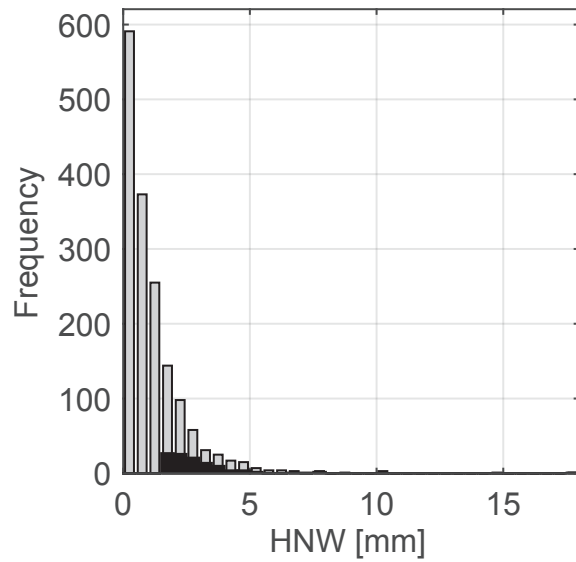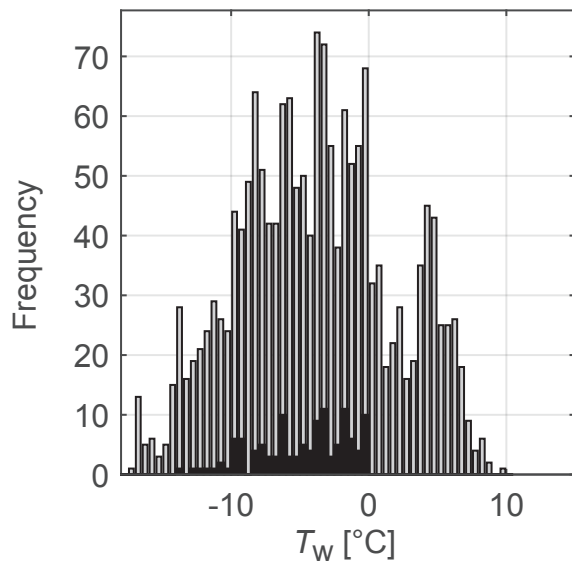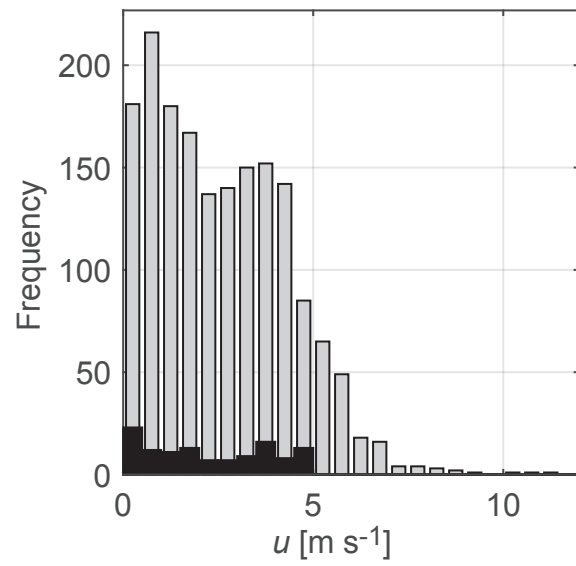

Supplement: Supplementary file 4 [file hess-22-2655-2018-supplement.zip › Supplement/S09.pdf]

Kühtai 10 Jan 1999 - 30 Sep 2011

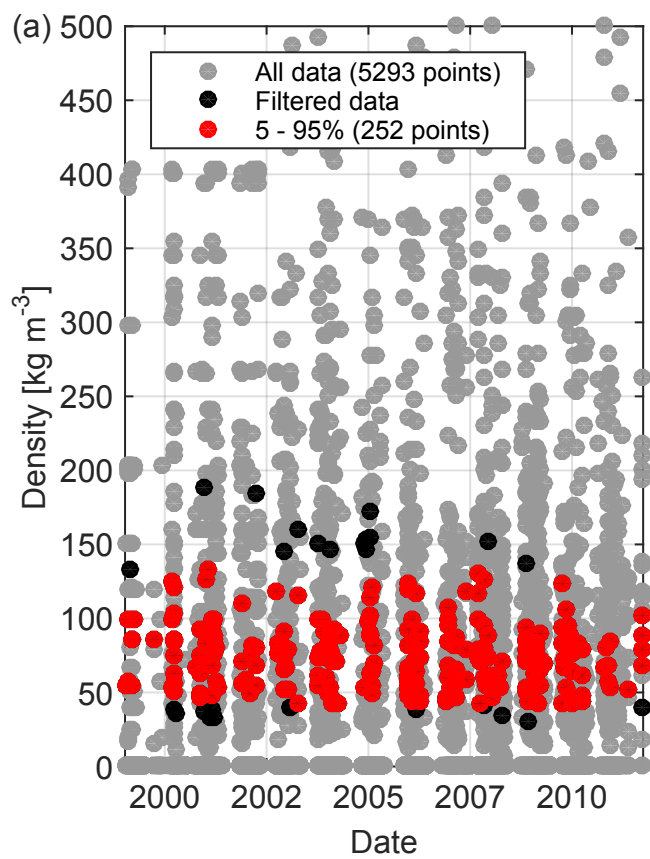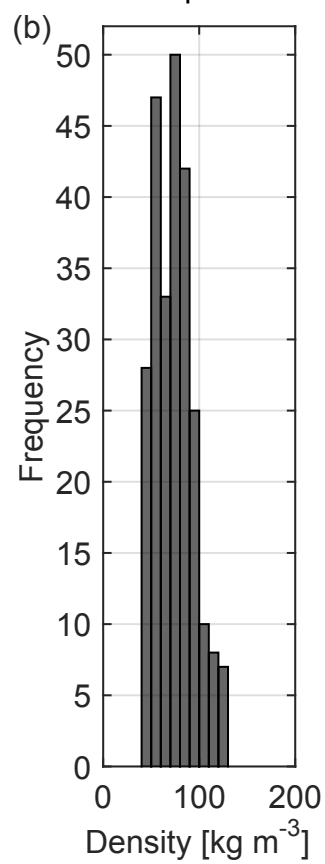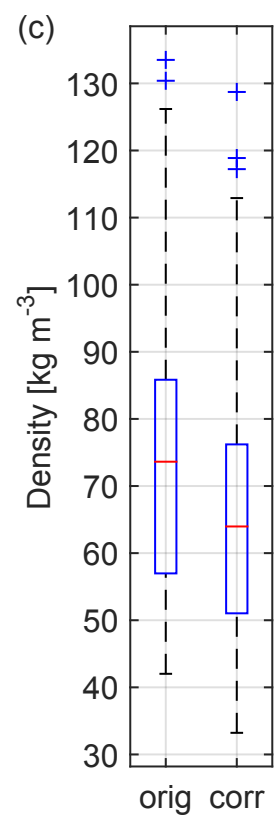

Supplement: Supplementary file 4 [file hess-22-2655-2018-supplement.zip › Supplement/S13.pdf]

Wattener Lizum 01 Oct 2011 - 30 Sep 2013

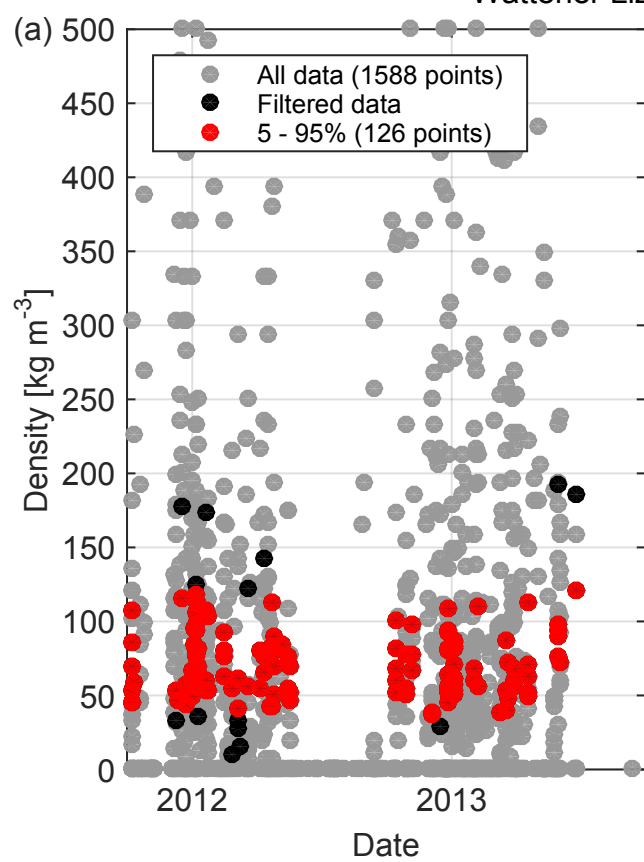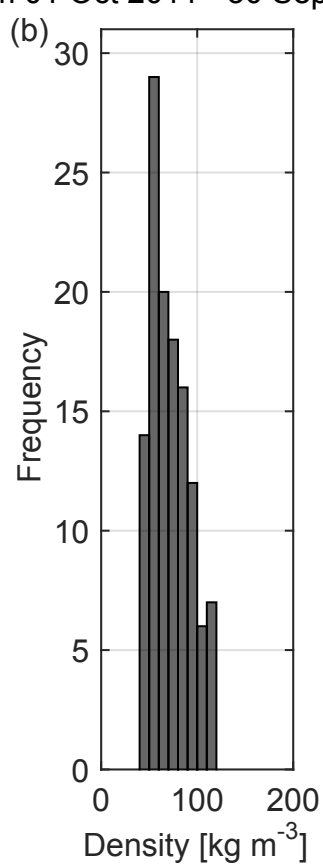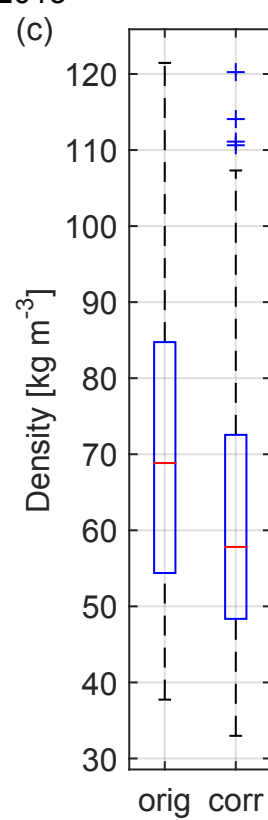

Supplement: Supplementary file 4 [file hess-22-2655-2018-supplement.zip › Supplement/S16.pdf]

Kühtai 01 Oct 2011 - 30 Sep 2013

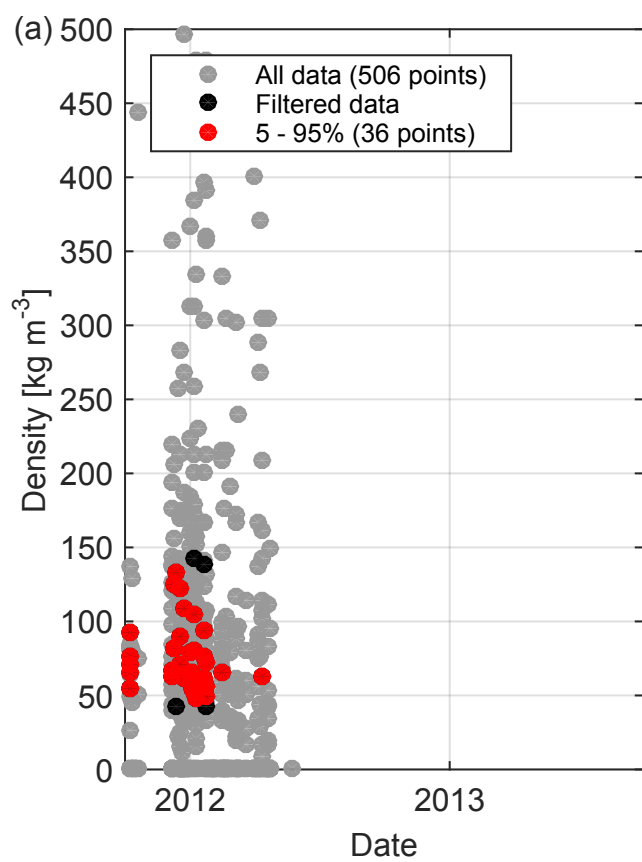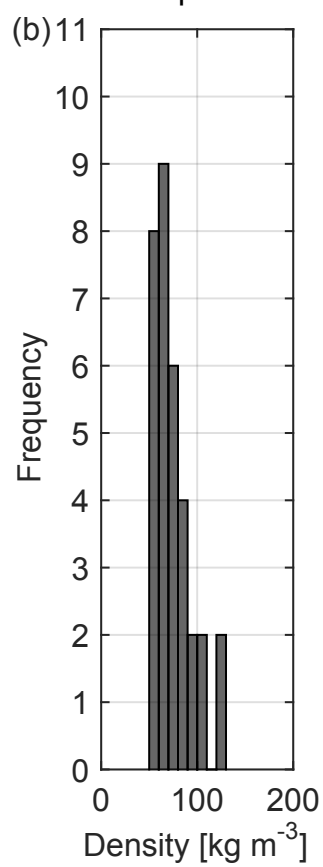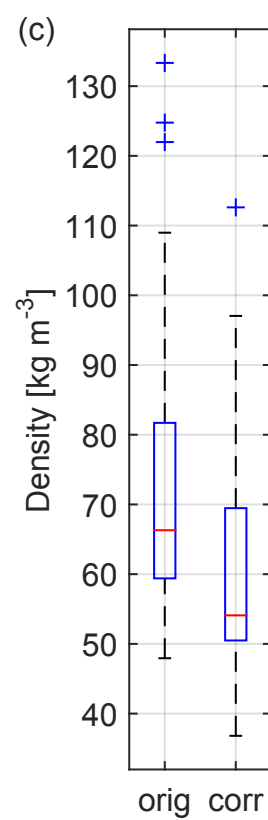

Supplement: Supplementary file 4 [file hess-22-2655-2018-supplement.zip › Supplement/S12.pdf]

Kühroint 01 Oct 2013 - 20 May 2015

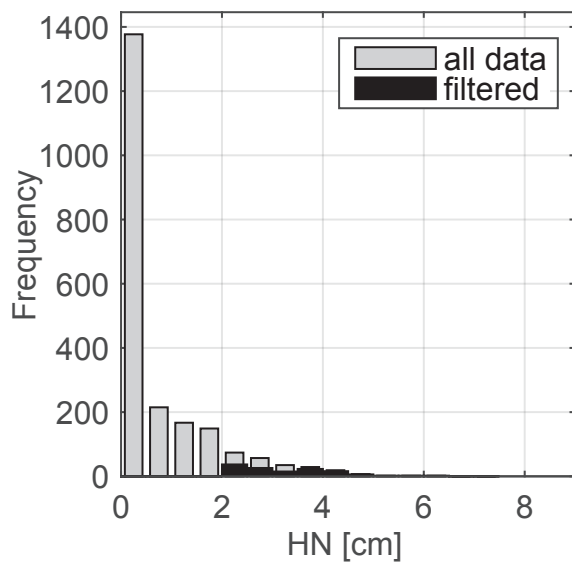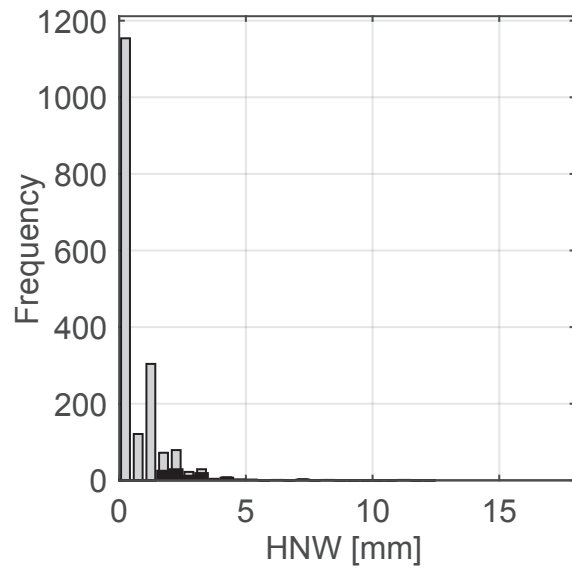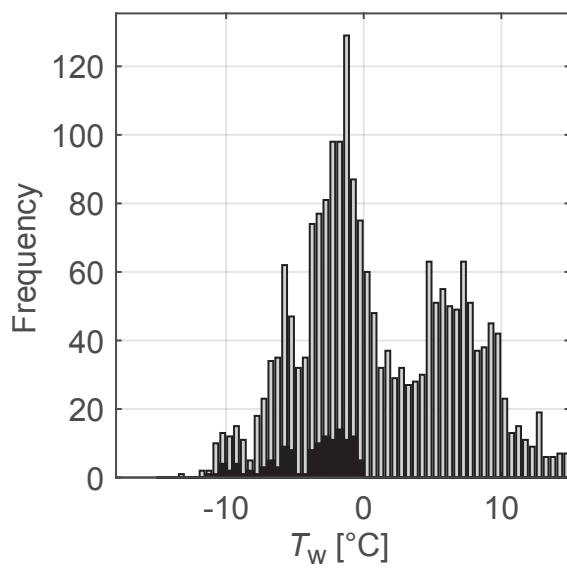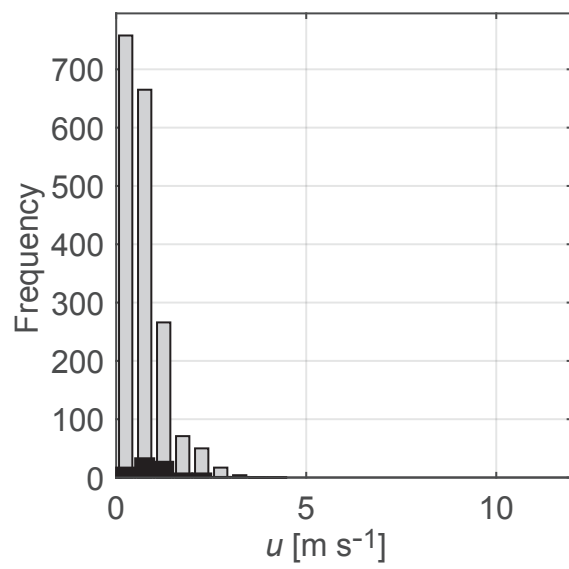

Supplement: Supplementary file 4 [file hess-22-2655-2018-supplement.zip › Supplement/S01.pdf]

Kühtai 01 Oct 2013 - 20 May 2015

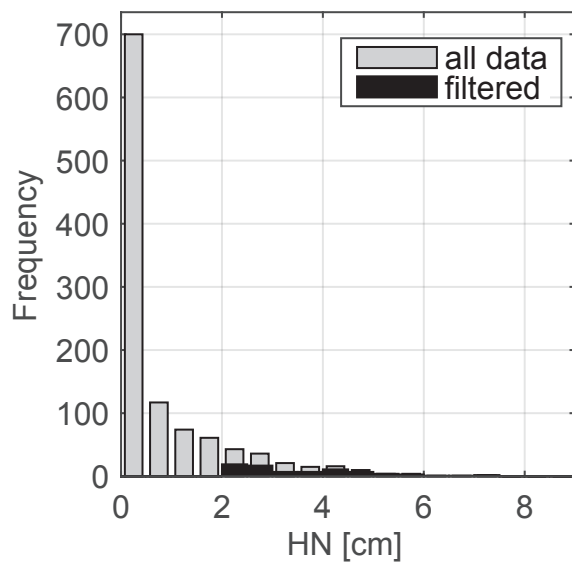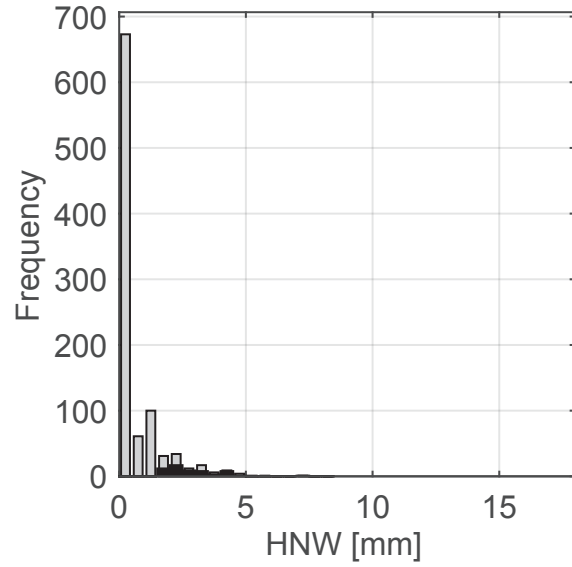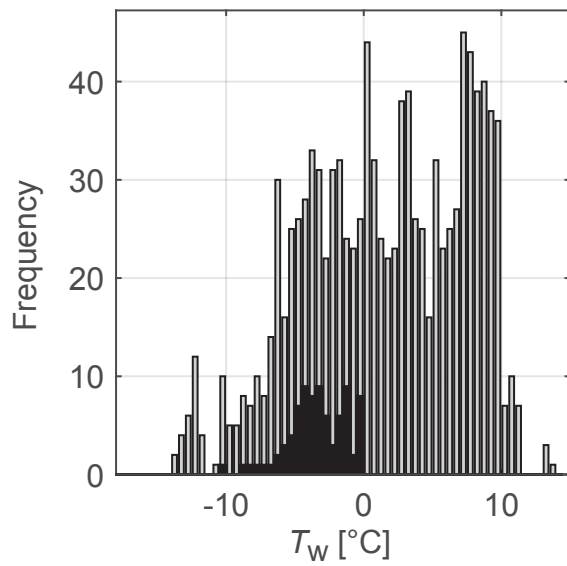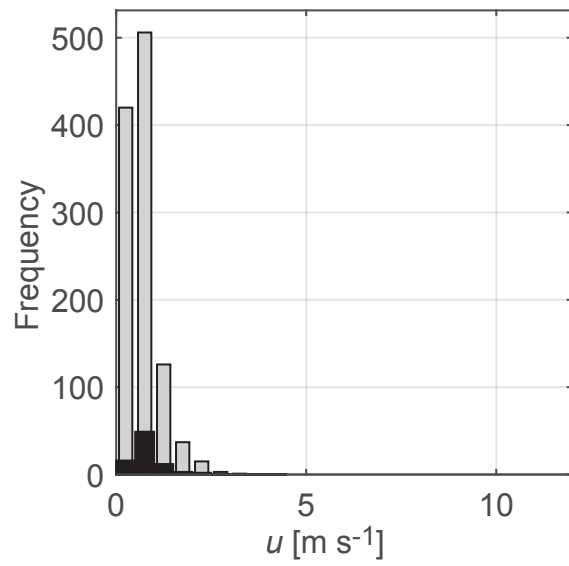

Supplement: Supplementary file 4 [file hess-22-2655-2018-supplement.zip › Supplement/S03.pdf]

Kühroint 01 Oct 2011 - 30 Sep 2013

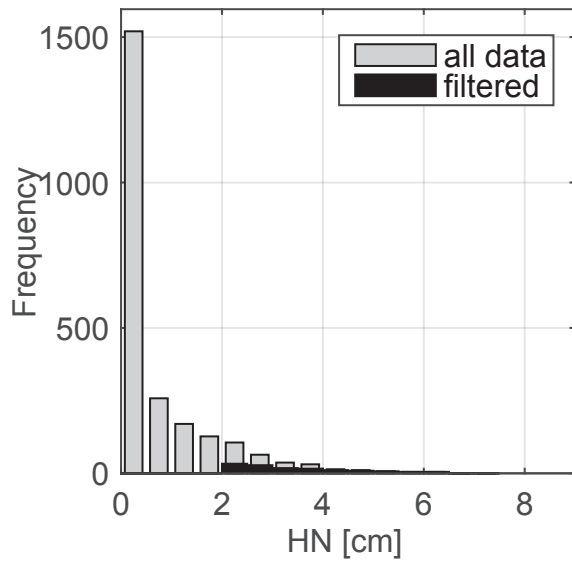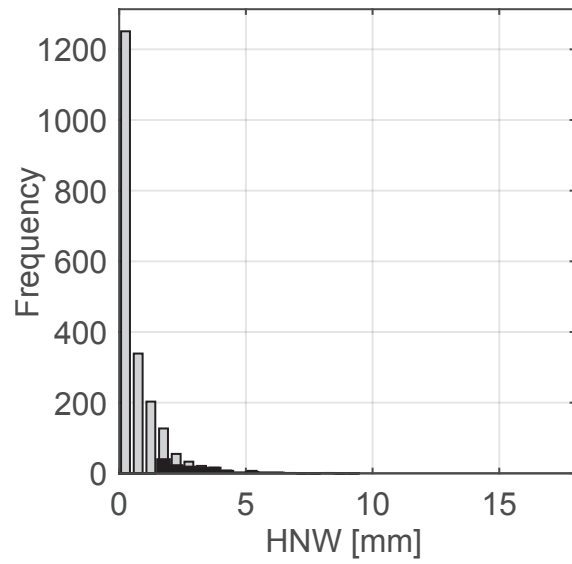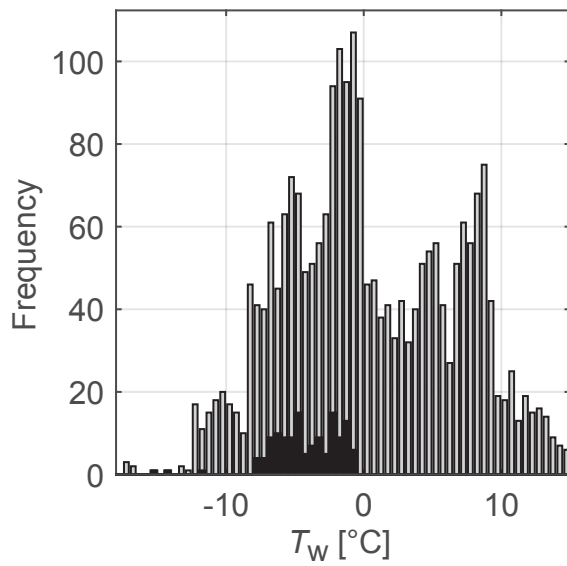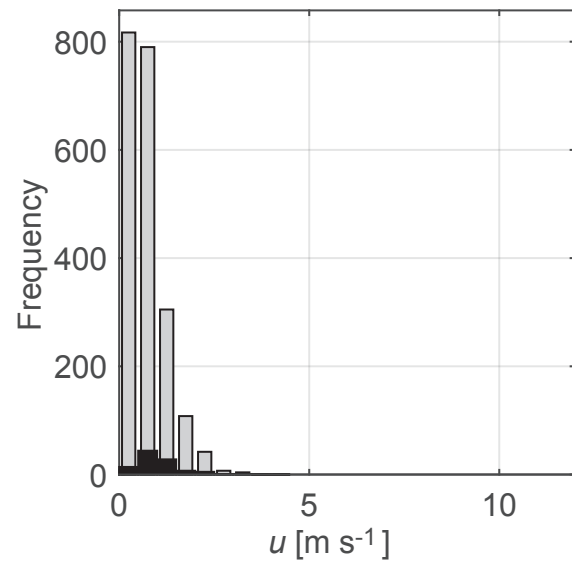

Supplement: Supplementary file 4 [file hess-22-2655-2018-supplement.zip › Supplement/S02.pdf]

Wattener Lizum 01 Oct 2011 - 30 Sep 2013

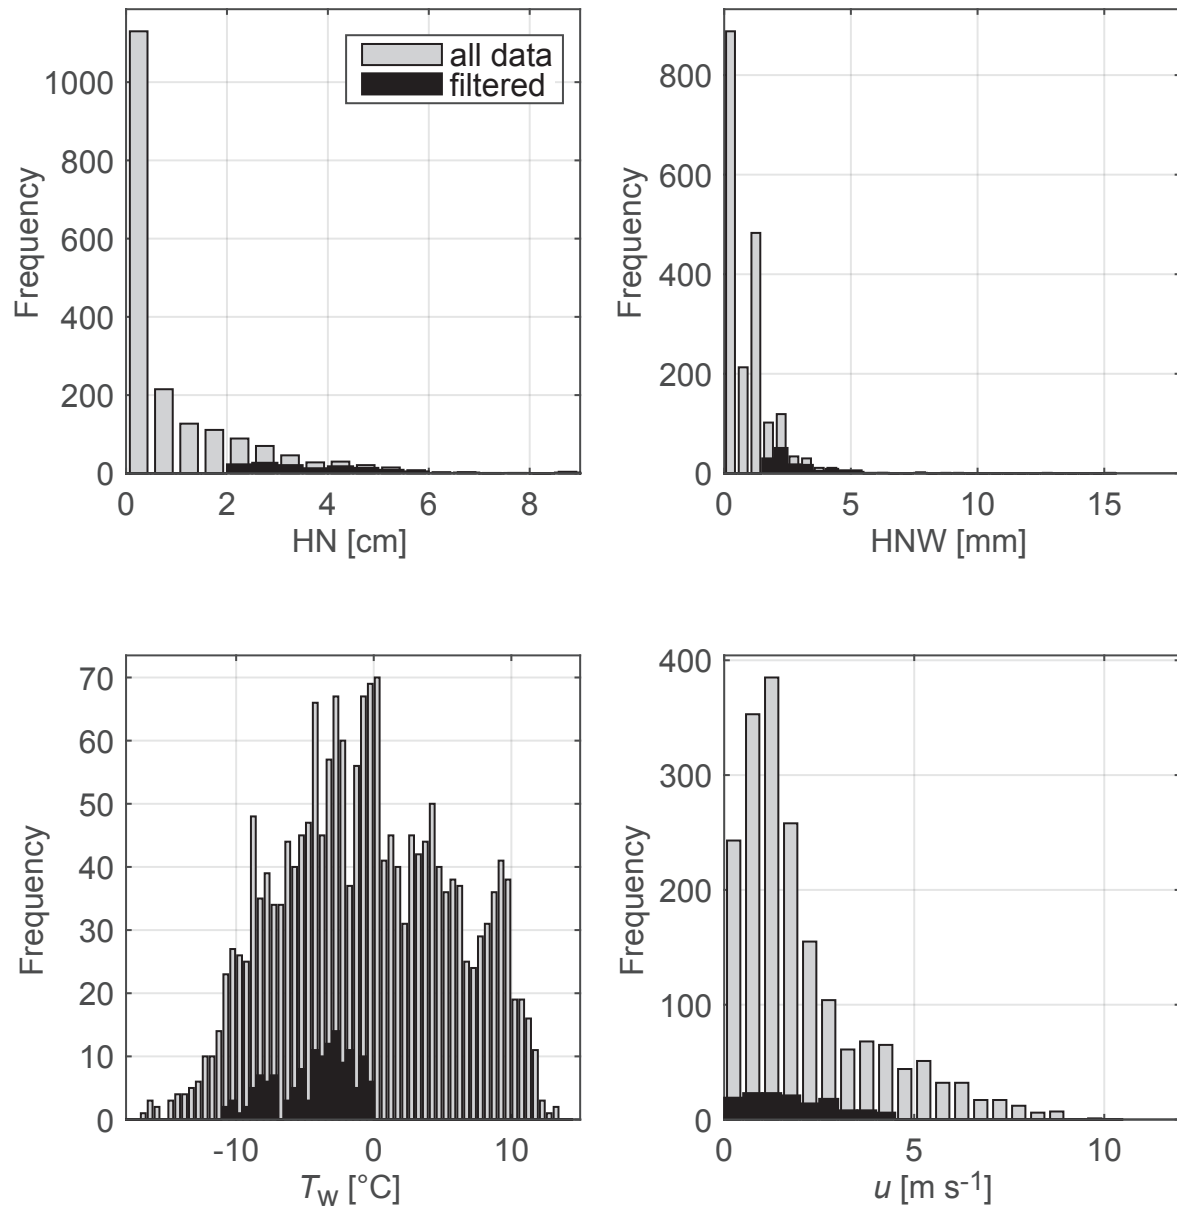

Supplement: Supplementary file 4 [file hess-22-2655-2018-supplement.zip › Supplement/S08.pdf]

Kühtai 01 Oct 2011 - 30 Sep 2013

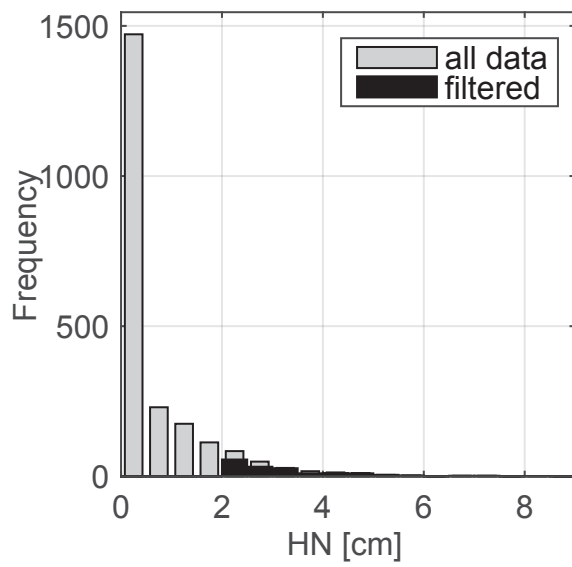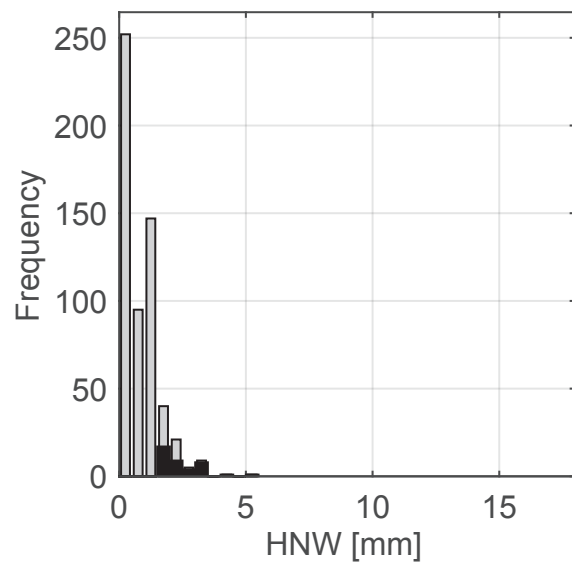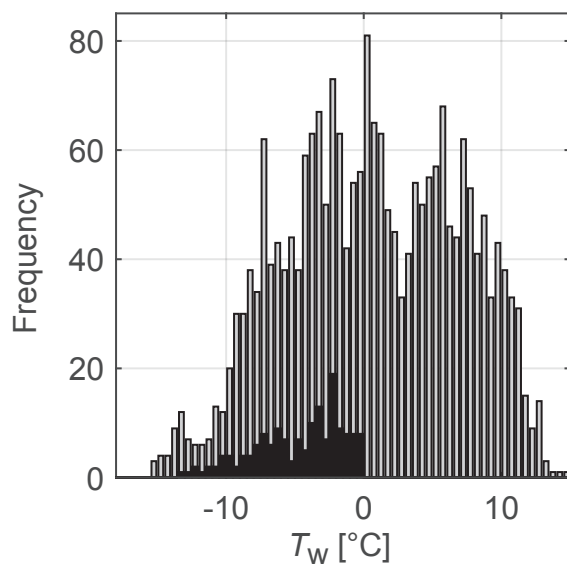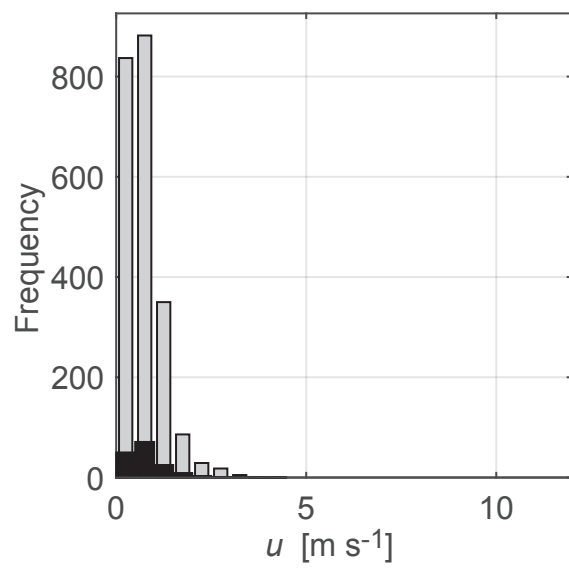

Supplement: Supplementary file 4 [file hess-22-2655-2018-supplement.zip › Supplement/S04.pdf]

Weissfluhjoch 01 Oct 2013 - 20 May 2015

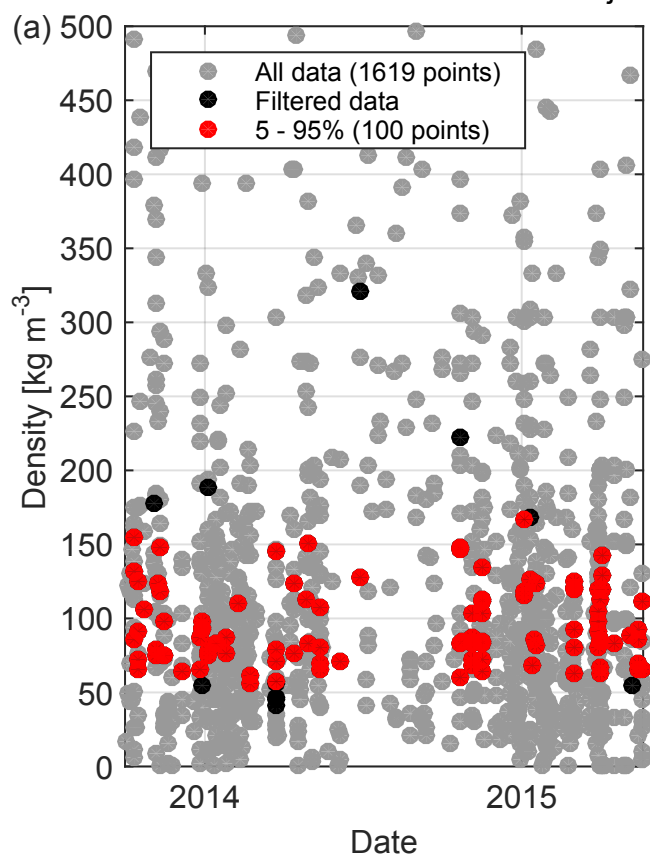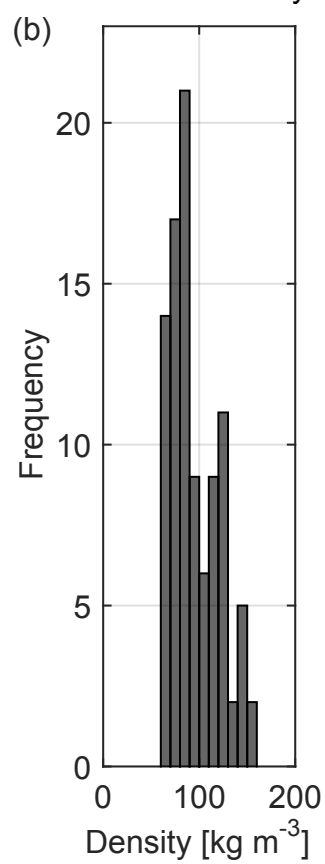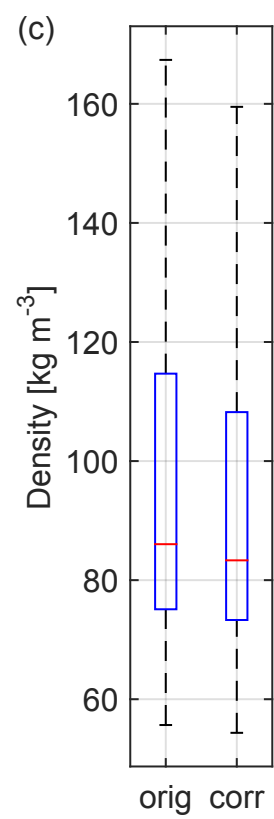

Supplement: Supplementary file 4 [file hess-22-2655-2018-supplement.zip › Supplement/S17.pdf]

Kühtai 10 Jan 1999 - 30 Sep 2011

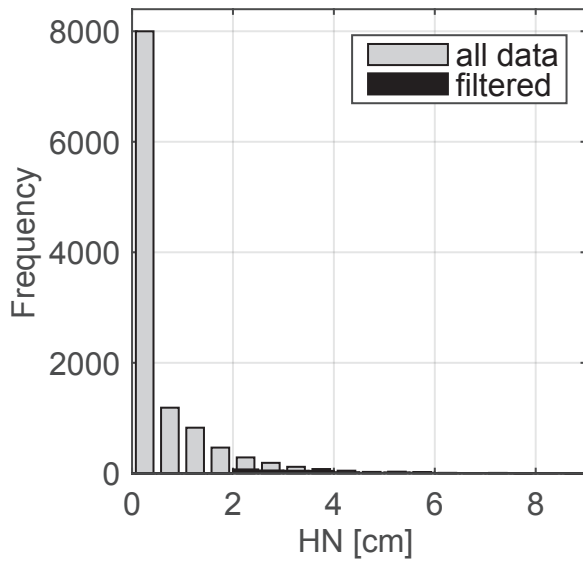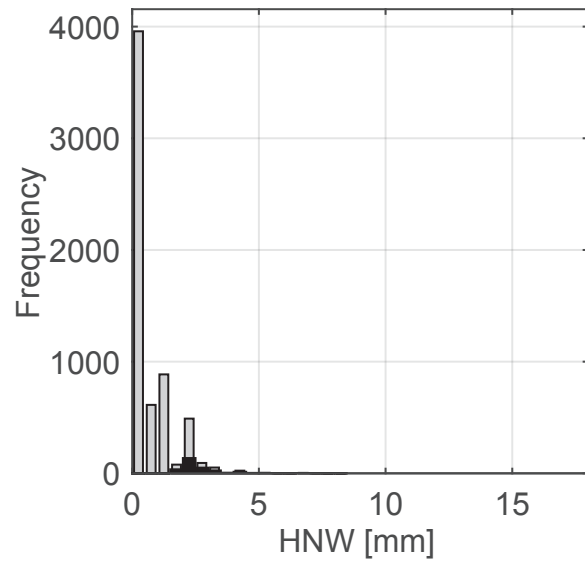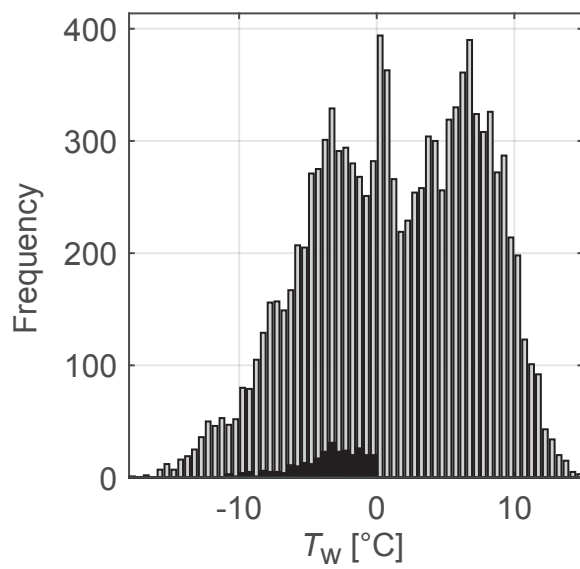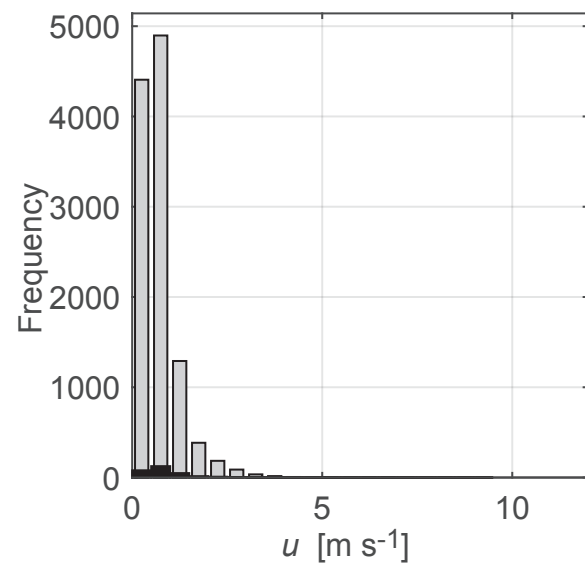

Supplement: Supplementary file 4 [file hess-22-2655-2018-supplement.zip › Supplement/S05.pdf]

Wattener Lizum 01 Oct 2013 - 20 May 2015

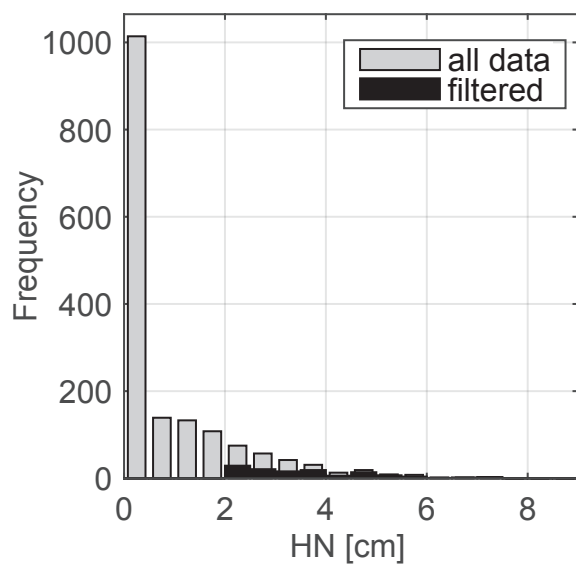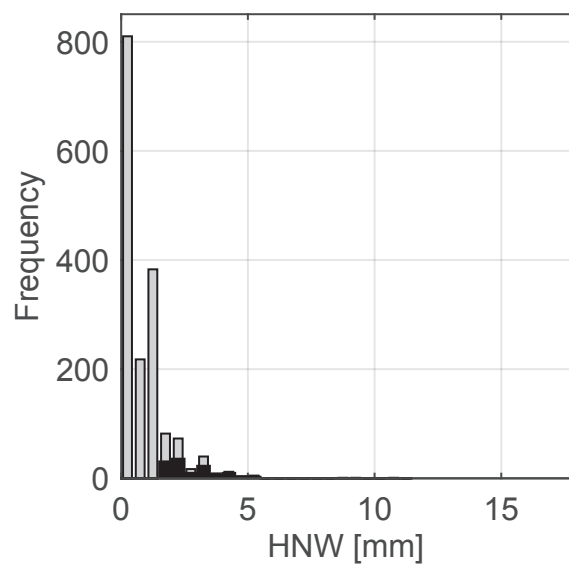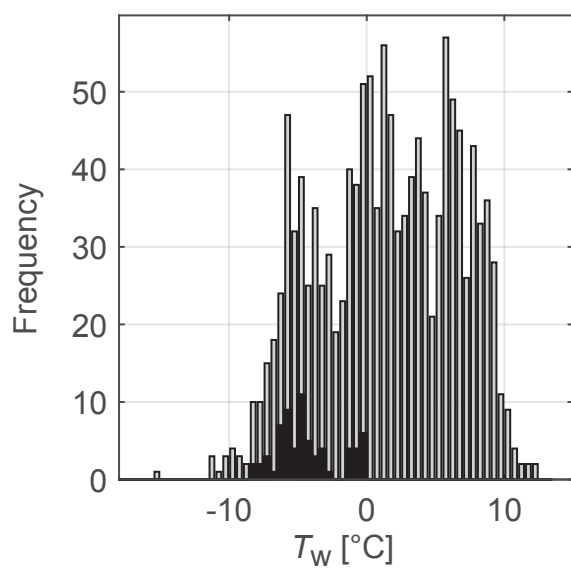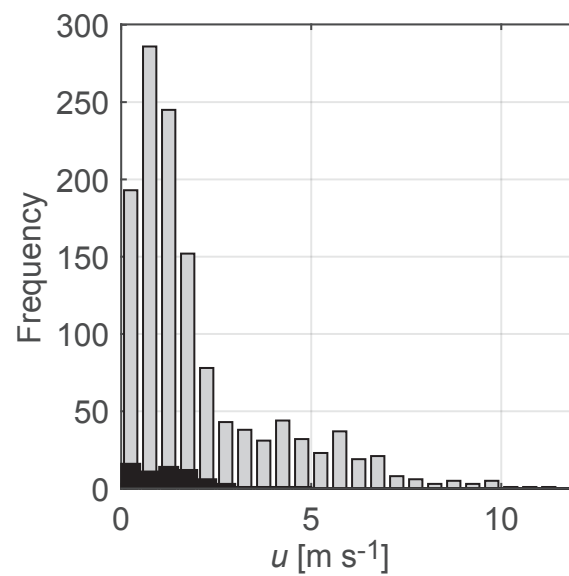

Supplement: Supplementary file 4 [file hess-22-2655-2018-supplement.zip › Supplement/S07.pdf]

Kühtai 01 Oct 2013 - 20 May 2015

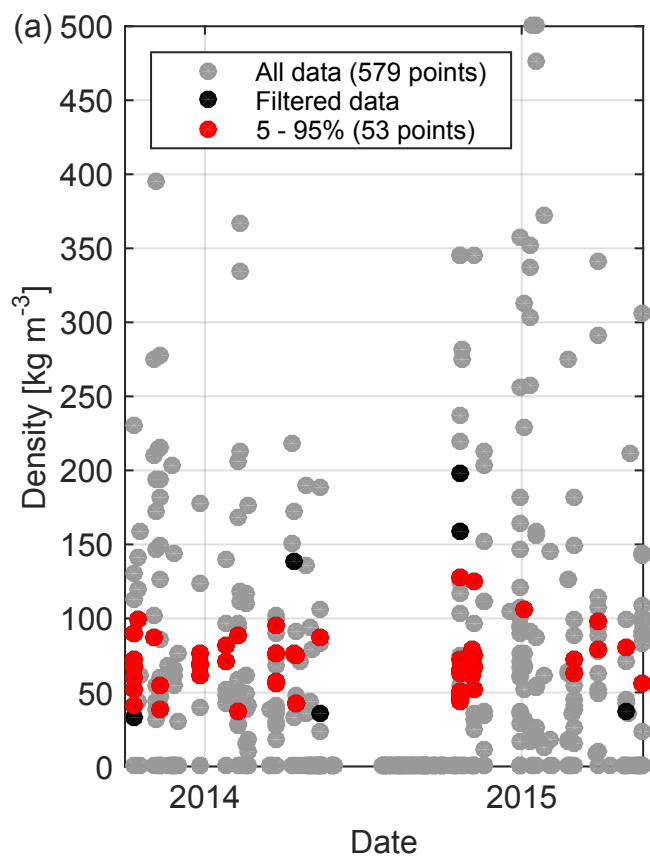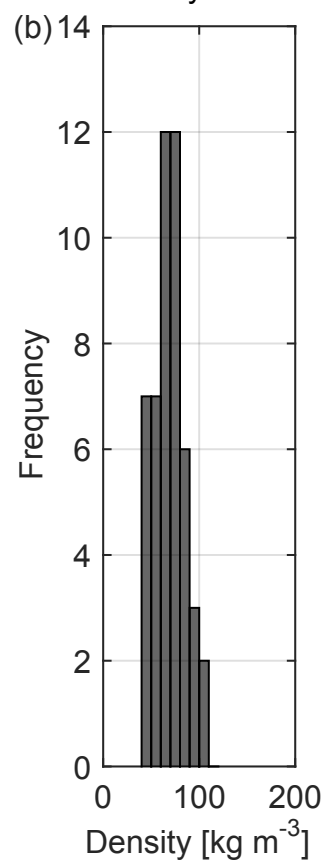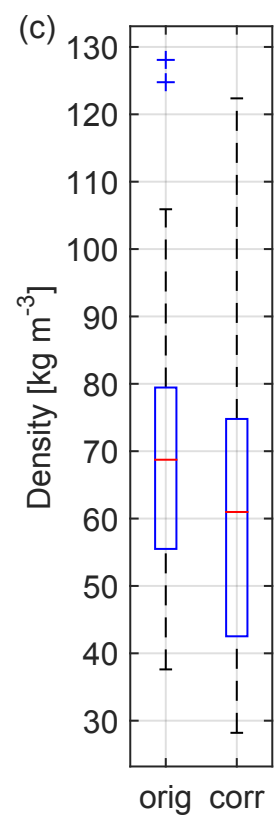

Supplement: Supplementary file 4 [file hess-22-2655-2018-supplement.zip › Supplement/S11.pdf]

Kühtai 27 Feb 1987 - 30 Sep 1999

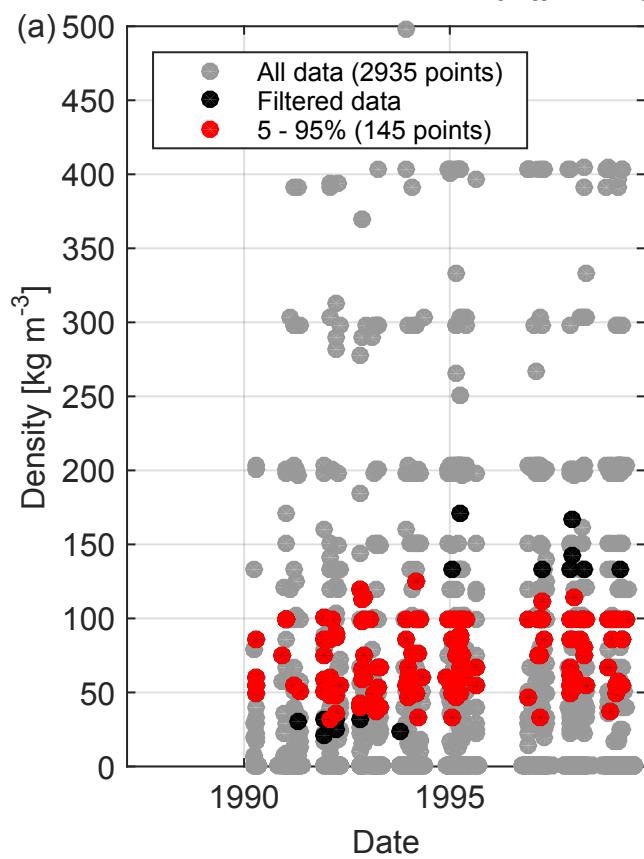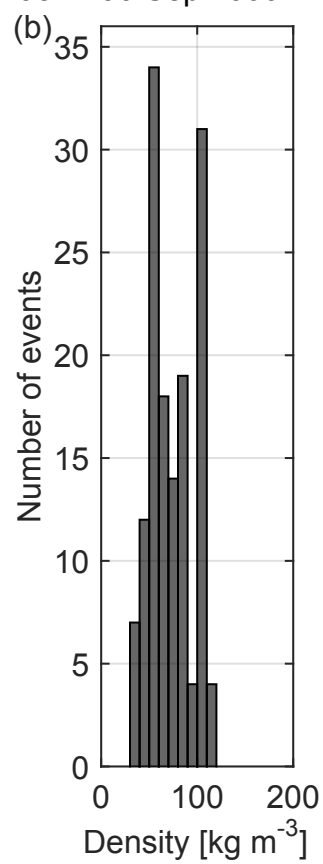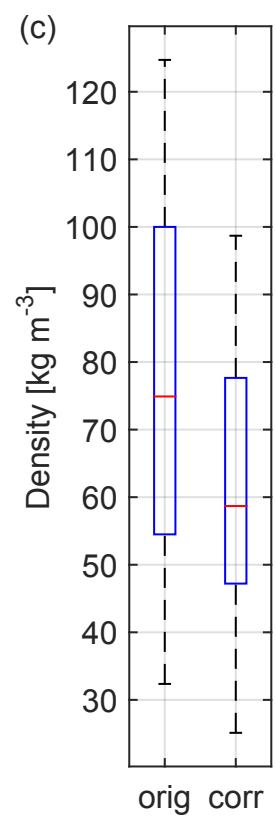

Supplement: Supplementary file 4 [file hess-22-2655-2018-supplement.zip › Supplement/S14.pdf]

Kühtai 27 Feb 1987 - 30 Sep 1999

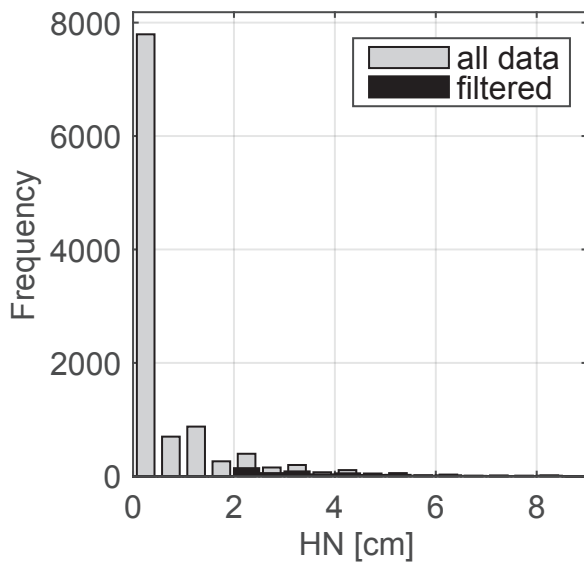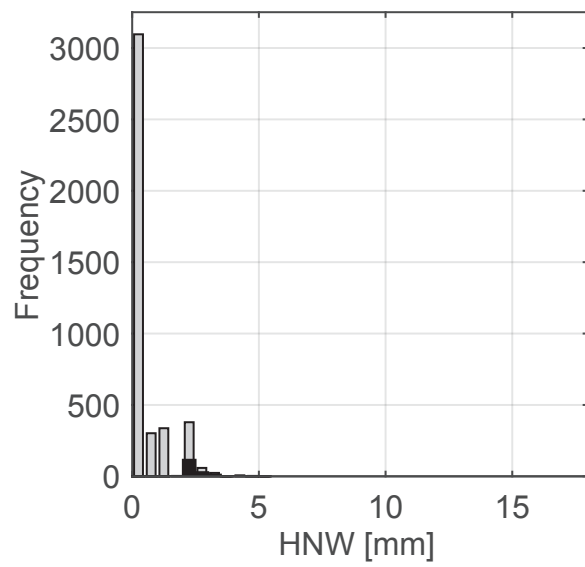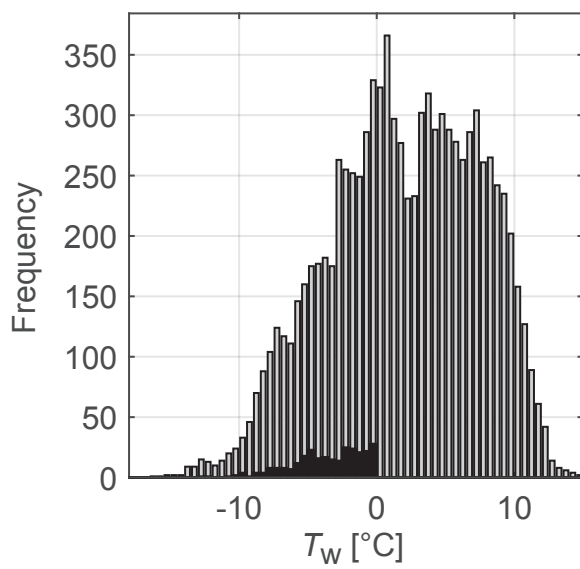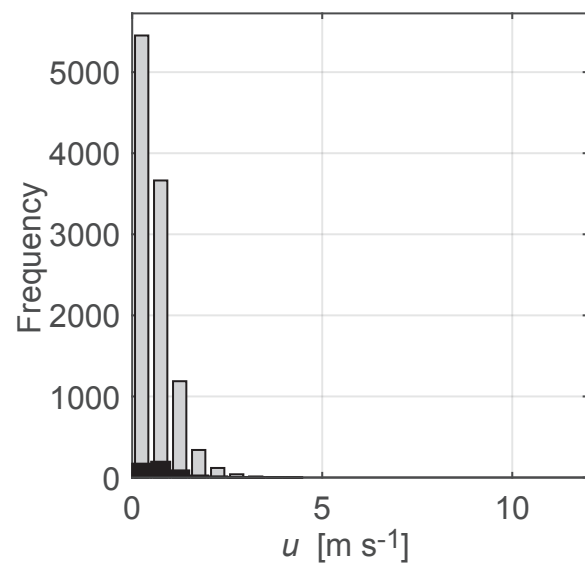

Supplement: Supplementary file 4 [file hess-22-2655-2018-supplement.zip › Supplement/S06.pdf]
